# Supplementary material for: Microtextural Characteristics of Ultramafic Rock-Forming Minerals and Their Effects on Carbon Sequestration
Source: Preprints.org preprint supplement (doi:10.20944/preprints202405.0743.v1), 2024-05-13
Supplement: Supplementary file 1 [file supplementary]

## Sheet: Created by PowDLL Converter
2-Theta	init. wehrlite	2-Theta	PR-18	2-Theta	PR-35	2-Theta	PR-60	2-Theta	PR-120	2-Theta	PR-230	2-Theta	PR-silt
2	34	2	40	2	35	2	25	2	33	2	42	2	36
2.04	23	2.04	40	2.04	30	2.04	21	2.04	36	2.04	28	2.04	35
2.08	36	2.08	33	2.08	24	2.08	27	2.08	34	2.08	20	2.08	30
2.12	35	2.12	44	2.12	31	2.12	20	2.12	41	2.12	40	2.12	35
2.16	25	2.16	28	2.16	25	2.16	23	2.16	18	2.16	35	2.16	28
2.2	33	2.2	40	2.2	27	2.2	19	2.2	39	2.2	20	2.2	29
2.24	36	2.24	47	2.24	27	2.24	22	2.24	40	2.24	27	2.24	30
2.28	34	2.28	34	2.28	23	2.28	18	2.28	31	2.28	27	2.28	26
2.32	44	2.32	44	2.32	20	2.32	25	2.32	37	2.32	21	2.32	35
2.36	29	2.36	31	2.36	26	2.36	17	2.36	22	2.36	27	2.36	28
2.4	36	2.4	37	2.4	20	2.4	14	2.4	18	2.4	32	2.4	29
2.44	20	2.44	30	2.44	28	2.44	13	2.44	30	2.44	21	2.44	34
2.48	22	2.48	27	2.48	28	2.48	16	2.48	23	2.48	22	2.48	32
2.52	13	2.52	35	2.52	25	2.52	27	2.52	27	2.52	27	2.52	24
2.56	24	2.56	31	2.56	26	2.56	14	2.56	33	2.56	18	2.56	19
2.6	32	2.6	24	2.6	32	2.6	13	2.6	26	2.6	27	2.6	19
2.64	18	2.64	38	2.64	22	2.64	20	2.64	23	2.64	21	2.64	17
2.68	17	2.68	33	2.68	16	2.68	19	2.68	40	2.68	24	2.68	25
2.72	22	2.72	42	2.72	14	2.72	7	2.72	24	2.72	19	2.72	22
2.76	24	2.76	25	2.76	23	2.76	19	2.76	23	2.76	20	2.76	26
2.8	25	2.8	39	2.8	21	2.8	16	2.8	25	2.8	14	2.8	23
2.84	26	2.84	28	2.84	15	2.84	15	2.84	15	2.84	19	2.84	25
2.88	25	2.88	21	2.88	21	2.88	11	2.88	16	2.88	19	2.88	17
2.92	20	2.92	29	2.92	14	2.92	16	2.92	27	2.92	24	2.92	18
2.96	12	2.96	31	2.96	23	2.96	14	2.96	19	2.96	24	2.96	16
3	27	3	23	3	16	3	19	3	29	3	22	3	29
3.04	19	3.04	23	3.04	13	3.04	15	3.04	11	3.04	21	3.04	21
3.08	17	3.08	33	3.08	10	3.08	15	3.08	19	3.08	21	3.08	23
3.12	12	3.12	21	3.12	23	3.12	13	3.12	24	3.12	11	3.12	21
3.16	21	3.16	25	3.16	21	3.16	16	3.16	17	3.16	21	3.16	23
3.2	25	3.2	17	3.2	18	3.2	14	3.2	20	3.2	15	3.2	25
3.24	21	3.24	32	3.24	20	3.24	7	3.24	22	3.24	23	3.24	16
3.28	14	3.28	18	3.28	21	3.28	9	3.28	14	3.28	18	3.28	11
3.32	11	3.32	21	3.32	18	3.32	16	3.32	24	3.32	20	3.32	21
3.36	20	3.36	23	3.36	25	3.36	12	3.36	20	3.36	11	3.36	19
3.4	12	3.4	24	3.4	16	3.4	14	3.4	16	3.4	17	3.4	21
3.44	20	3.44	16	3.44	17	3.44	21	3.44	20	3.44	16	3.44	28
3.48	17	3.48	17	3.48	26	3.48	19	3.48	22	3.48	8	3.48	20
3.52	17	3.52	15	3.52	25	3.52	21	3.52	23	3.52	15	3.52	19
3.56	18	3.56	23	3.56	13	3.56	14	3.56	14	3.56	14	3.56	20
3.6	22	3.6	14	3.6	14	3.6	25	3.6	17	3.6	17	3.6	20
3.64	20	3.64	18	3.64	14	3.64	15	3.64	26	3.64	20	3.64	17
3.68	17	3.68	17	3.68	25	3.68	9	3.68	16	3.68	8	3.68	20
3.72	15	3.72	15	3.72	16	3.72	8	3.72	13	3.72	16	3.72	20
3.76	12	3.76	16	3.76	22	3.76	12	3.76	13	3.76	13	3.76	13
3.8	11	3.8	24	3.8	20	3.8	9	3.8	23	3.8	18	3.8	16
3.84	8	3.84	24	3.84	18	3.84	15	3.84	17	3.84	11	3.84	15
3.88	8	3.88	16	3.88	15	3.88	11	3.88	10	3.88	21	3.88	19
3.92	17	3.92	19	3.92	10	3.92	14	3.92	12	3.92	16	3.92	16
3.96	15	3.96	19	3.96	17	3.96	11	3.96	13	3.96	15	3.96	19
4	17	4	10	4	14	4	17	4	16	4	9	4	18
4.04	16	4.04	13	4.04	18	4.04	12	4.04	18	4.04	21	4.04	16
4.08	9	4.08	20	4.08	20	4.08	11	4.08	8	4.08	17	4.08	19
4.12	17	4.12	17	4.12	21	4.12	6	4.12	36	4.12	17	4.12	14
4.16	10	4.16	20	4.16	23	4.16	12	4.16	13	4.16	14	4.16	9
4.2	11	4.2	22	4.2	20	4.2	12	4.2	12	4.2	13	4.2	11
4.24	20	4.24	12	4.24	12	4.24	10	4.24	14	4.24	14	4.24	11
4.28	10	4.28	14	4.28	25	4.28	9	4.28	19	4.28	19	4.28	11
4.32	13	4.32	17	4.32	22	4.32	4	4.32	15	4.32	11	4.32	15
4.36	16	4.36	15	4.36	14	4.36	9	4.36	12	4.36	16	4.36	17
4.4	11	4.4	12	4.4	15	4.4	8	4.4	17	4.4	13	4.4	16
4.44	18	4.44	16	4.44	17	4.44	13	4.44	12	4.44	16	4.44	12
4.48	13	4.48	10	4.48	17	4.48	10	4.48	18	4.48	14	4.48	14
4.52	17	4.52	13	4.52	15	4.52	17	4.52	15	4.52	13	4.52	10
4.56	16	4.56	8	4.56	14	4.56	8	4.56	10	4.56	14	4.56	16
4.6	12	4.6	14	4.6	13	4.6	12	4.6	20	4.6	16	4.6	11
4.64	14	4.64	22	4.64	3	4.64	10	4.64	19	4.64	10	4.64	12
4.68	11	4.68	18	4.68	13	4.68	14	4.68	15	4.68	10	4.68	23
4.72	2	4.72	11	4.72	17	4.72	17	4.72	15	4.72	9	4.72	15
4.76	11	4.76	12	4.76	4	4.76	17	4.76	17	4.76	14	4.76	12
4.8	12	4.8	10	4.8	13	4.8	14	4.8	12	4.8	14	4.8	15
4.84	6	4.84	12	4.84	7	4.84	16	4.84	15	4.84	12	4.84	17
4.88	10	4.88	8	4.88	15	4.88	13	4.88	17	4.88	12	4.88	12
4.92	13	4.92	18	4.92	10	4.92	9	4.92	14	4.92	16	4.92	15
4.96	19	4.96	19	4.96	12	4.96	9	4.96	17	4.96	15	4.96	14
5	10	5	9	5	14	5	13	5	19	5	10	5	11
5.04	12	5.04	16	5.04	13	5.04	8	5.04	18	5.04	8	5.04	8
5.08	11	5.08	15	5.08	16	5.08	7	5.08	14	5.08	14	5.08	12
5.12	10	5.12	11	5.12	8	5.12	11	5.12	12	5.12	11	5.12	19
5.16	13	5.16	19	5.16	13	5.16	9	5.16	19	5.16	15	5.16	8
5.2	9	5.2	15	5.2	13	5.2	15	5.2	22	5.2	17	5.2	15
5.24	4	5.24	19	5.24	8	5.24	8	5.24	23	5.24	10	5.24	19
5.28	19	5.28	12	5.28	9	5.28	13	5.28	11	5.28	9	5.28	8
5.32	11	5.32	7	5.32	13	5.32	13	5.32	12	5.32	10	5.32	13
5.36	7	5.36	13	5.36	5	5.36	8	5.36	9	5.36	10	5.36	13
5.4	5	5.4	10	5.4	10	5.4	3	5.4	10	5.4	9	5.4	8
5.44	11	5.44	14	5.44	16	5.44	12	5.44	16	5.44	10	5.44	8
5.48	11	5.48	14	5.48	6	5.48	10	5.48	15	5.48	16	5.48	6
5.52	15	5.52	10	5.52	12	5.52	17	5.52	16	5.52	11	5.52	14
5.56	13	5.56	17	5.56	17	5.56	9	5.56	9	5.56	11	5.56	9
5.6	10	5.6	13	5.6	11	5.6	8	5.6	18	5.6	20	5.6	10
5.64	13	5.64	14	5.64	16	5.64	7	5.64	8	5.64	8	5.64	12
5.68	11	5.68	14	5.68	9	5.68	7	5.68	18	5.68	10	5.68	8
5.72	10	5.72	16	5.72	10	5.72	5	5.72	9	5.72	14	5.72	13
5.76	12	5.76	19	5.76	17	5.76	10	5.76	19	5.76	5	5.76	11
5.8	13	5.8	11	5.8	8	5.8	13	5.8	11	5.8	8	5.8	13
5.84	6	5.84	13	5.84	17	5.84	13	5.84	20	5.84	13	5.84	12
5.88	16	5.88	19	5.88	13	5.88	11	5.88	18	5.88	11	5.88	21
5.92	13	5.92	13	5.92	11	5.92	10	5.92	15	5.92	8	5.92	20
5.96	10	5.96	12	5.96	8	5.96	15	5.96	21	5.96	15	5.96	16
6	13	6	15	6	14	6	17	6	23	6	17	6	17
6.04	7	6.04	25	6.04	8	6.04	16	6.04	29	6.04	21	6.04	22
6.08	14	6.08	13	6.08	12	6.08	20	6.08	27	6.08	17	6.08	19
6.12	18	6.12	17	6.12	14	6.12	23	6.12	51	6.12	19	6.12	17
6.16	12	6.16	12	6.16	6	6.16	24	6.16	24	6.16	15	6.16	25
6.2	13	6.2	8	6.2	17	6.2	20	6.2	11	6.2	14	6.2	22
6.24	13	6.24	19	6.24	6	6.24	25	6.24	10	6.24	18	6.24	18
6.28	18	6.28	16	6.28	3	6.28	27	6.28	15	6.28	12	6.28	22
6.32	16	6.32	15	6.32	9	6.32	12	6.32	12	6.32	16	6.32	21
6.36	11	6.36	13	6.36	15	6.36	9	6.36	14	6.36	20	6.36	12
6.4	12	6.4	18	6.4	7	6.4	16	6.4	6	6.4	12	6.4	10
6.44	8	6.44	13	6.44	8	6.44	12	6.44	14	6.44	11	6.44	14
6.48	13	6.48	8	6.48	15	6.48	13	6.48	17	6.48	15	6.48	13
6.52	10	6.52	11	6.52	7	6.52	11	6.52	14	6.52	11	6.52	9
6.56	12	6.56	12	6.56	10	6.56	6	6.56	9	6.56	7	6.56	14
6.6	10	6.6	10	6.6	13	6.6	13	6.6	20	6.6	8	6.6	11
6.64	10	6.64	16	6.64	11	6.64	9	6.64	5	6.64	9	6.64	14
6.68	9	6.68	15	6.68	11	6.68	11	6.68	11	6.68	4	6.68	14
6.72	7	6.72	5	6.72	8	6.72	8	6.72	15	6.72	11	6.72	13
6.76	12	6.76	9	6.76	11	6.76	4	6.76	9	6.76	12	6.76	8
6.8	9	6.8	11	6.8	5	6.8	6	6.8	8	6.8	10	6.8	10
6.84	14	6.84	13	6.84	8	6.84	9	6.84	6	6.84	6	6.84	12
6.88	12	6.88	6	6.88	6	6.88	7	6.88	13	6.88	8	6.88	7
6.92	6	6.92	11	6.92	8	6.92	6	6.92	9	6.92	5	6.92	12
6.96	2	6.96	8	6.96	6	6.96	8	6.96	11	6.96	8	6.96	7
7	7	7	11	7	11	7	6	7	8	7	6	7	10
7.04	12	7.04	9	7.04	6	7.04	5	7.04	10	7.04	7	7.04	13
7.08	13	7.08	9	7.08	13	7.08	6	7.08	5	7.08	6	7.08	11
7.12	7	7.12	10	7.12	5	7.12	7	7.12	13	7.12	10	7.12	11
7.16	10	7.16	13	7.16	9	7.16	4	7.16	15	7.16	11	7.16	8
7.2	11	7.2	17	7.2	7	7.2	4	7.2	6	7.2	9	7.2	12
7.24	18	7.24	7	7.24	10	7.24	7	7.24	10	7.24	13	7.24	6
7.28	10	7.28	15	7.28	11	7.28	4	7.28	6	7.28	5	7.28	7
7.32	4	7.32	11	7.32	3	7.32	7	7.32	12	7.32	9	7.32	6
7.36	12	7.36	6	7.36	9	7.36	9	7.36	11	7.36	11	7.36	15
7.4	11	7.4	5	7.4	6	7.4	8	7.4	8	7.4	11	7.4	13
7.44	7	7.44	8	7.44	9	7.44	10	7.44	15	7.44	7	7.44	10
7.48	11	7.48	7	7.48	4	7.48	11	7.48	7	7.48	9	7.48	10
7.52	7	7.52	14	7.52	7	7.52	12	7.52	14	7.52	9	7.52	8
7.56	6	7.56	4	7.56	10	7.56	6	7.56	8	7.56	5	7.56	6
7.6	8	7.6	9	7.6	11	7.6	10	7.6	6	7.6	6	7.6	5
7.64	10	7.64	16	7.64	13	7.64	5	7.64	10	7.64	8	7.64	3
7.68	8	7.68	8	7.68	6	7.68	8	7.68	9	7.68	6	7.68	8
7.72	10	7.72	6	7.72	11	7.72	1	7.72	13	7.72	7	7.72	10
7.76	7	7.76	8	7.76	5	7.76	7	7.76	18	7.76	11	7.76	6
7.8	11	7.8	6	7.8	6	7.8	7	7.8	8	7.8	7	7.8	4
7.84	8	7.84	7	7.84	10	7.84	6	7.84	13	7.84	10	7.84	13
7.88	1	7.88	8	7.88	8	7.88	4	7.88	15	7.88	3	7.88	8
7.92	7	7.92	4	7.92	13	7.92	6	7.92	10	7.92	9	7.92	3
7.96	6	7.96	5	7.96	7	7.96	10	7.96	10	7.96	2	7.96	6
8	8	8	10	8	4	8	7	8	7	8	8	8	5
8.04	12	8.04	9	8.04	3	8.04	7	8.04	9	8.04	13	8.04	12
8.08	8	8.08	9	8.08	8	8.08	4	8.08	6	8.08	4	8.08	7
8.12	5	8.12	6	8.12	6	8.12	10	8.12	9	8.12	10	8.12	9
8.16	8	8.16	8	8.16	9	8.16	8	8.16	11	8.16	8	8.16	5
8.2	5	8.2	5	8.2	7	8.2	6	8.2	11	8.2	6	8.2	6
8.24	8	8.24	9	8.24	8	8.24	11	8.24	9	8.24	9	8.24	4
8.28	8	8.28	7	8.28	7	8.28	4	8.28	13	8.28	12	8.28	8
8.32	5	8.32	9	8.32	4	8.32	6	8.32	4	8.32	9	8.32	8
8.36	10	8.36	10	8.36	7	8.36	8	8.36	14	8.36	7	8.36	8
8.4	5	8.4	6	8.4	2	8.4	5	8.4	10	8.4	9	8.4	4
8.44	5	8.44	9	8.44	5	8.44	8	8.44	8	8.44	9	8.44	6
8.48	4	8.48	8	8.48	13	8.48	10	8.48	9	8.48	12	8.48	7
8.52	8	8.52	9	8.52	5	8.52	10	8.52	4	8.52	7	8.52	13
8.56	8	8.56	10	8.56	9	8.56	3	8.56	9	8.56	4	8.56	7
8.6	7	8.6	10	8.6	3	8.6	7	8.6	9	8.6	10	8.6	4
8.64	8	8.64	10	8.64	9	8.64	5	8.64	12	8.64	9	8.64	11
8.68	6	8.68	13	8.68	4	8.68	13	8.68	17	8.68	14	8.68	10
8.72	9	8.72	14	8.72	5	8.72	9	8.72	9	8.72	9	8.72	5
8.76	4	8.76	10	8.76	7	8.76	10	8.76	12	8.76	5	8.76	9
8.8	10	8.8	10	8.8	6	8.8	7	8.8	12	8.8	8	8.8	14
8.84	8	8.84	7	8.84	6	8.84	6	8.84	6	8.84	12	8.84	13
8.88	8	8.88	11	8.88	6	8.88	4	8.88	9	8.88	4	8.88	3
8.92	11	8.92	9	8.92	8	8.92	12	8.92	6	8.92	9	8.92	7
8.96	5	8.96	9	8.96	9	8.96	4	8.96	8	8.96	5	8.96	5
9	9	9	8	9	7	9	9	9	6	9	8	9	11
9.04	8	9.04	6	9.04	6	9.04	10	9.04	13	9.04	9	9.04	3
9.08	7	9.08	6	9.08	6	9.08	7	9.08	8	9.08	5	9.08	8
9.12	8	9.12	13	9.12	5	9.12	8	9.12	3	9.12	8	9.12	7
9.16	5	9.16	13	9.16	7	9.16	8	9.16	7	9.16	8	9.16	5
9.2	6	9.2	8	9.2	3	9.2	7	9.2	8	9.2	4	9.2	2
9.24	6	9.24	11	9.24	6	9.24	6	9.24	8	9.24	7	9.24	6
9.28	7	9.28	7	9.28	6	9.28	8	9.28	12	9.28	7	9.28	8
9.32	12	9.32	6	9.32	8	9.32	12	9.32	9	9.32	8	9.32	8
9.36	9	9.36	9	9.36	10	9.36	8	9.36	10	9.36	7	9.36	2
9.4	9	9.4	10	9.4	7	9.4	9	9.4	10	9.4	7	9.4	7
9.44	6	9.44	10	9.44	3	9.44	7	9.44	9	9.44	4	9.44	10
9.48	3	9.48	7	9.48	7	9.48	5	9.48	4	9.48	13	9.48	10
9.52	8	9.52	10	9.52	13	9.52	4	9.52	10	9.52	9	9.52	5
9.56	9	9.56	9	9.56	7	9.56	6	9.56	12	9.56	4	9.56	8
9.6	10	9.6	7	9.6	10	9.6	2	9.6	9	9.6	5	9.6	8
9.64	4	9.64	9	9.64	8	9.64	7	9.64	10	9.64	7	9.64	8
9.68	10	9.68	7	9.68	6	9.68	2	9.68	3	9.68	10	9.68	11
9.72	2	9.72	8	9.72	11	9.72	11	9.72	9	9.72	8	9.72	6
9.76	6	9.76	13	9.76	9	9.76	7	9.76	8	9.76	6	9.76	8
9.8	7	9.8	9	9.8	9	9.8	8	9.8	4	9.8	6	9.8	9
9.84	10	9.84	6	9.84	9	9.84	9	9.84	12	9.84	9	9.84	11
9.88	2	9.88	10	9.88	7	9.88	7	9.88	9	9.88	10	9.88	8
9.92	7	9.92	9	9.92	8	9.92	8	9.92	3	9.92	5	9.92	9
9.96	9	9.96	6	9.96	4	9.96	4	9.96	12	9.96	10	9.96	10
10	4	10	7	10	6	10	5	10	7	10	6	10	4
10.04	11	10.04	11	10.04	7	10.04	9	10.04	6	10.04	5	10.04	7
10.08	5	10.08	8	10.08	8	10.08	2	10.08	7	10.08	1	10.08	6
10.12	9	10.12	5	10.12	5	10.12	5	10.12	9	10.12	5	10.12	7
10.16	8	10.16	9	10.16	13	10.16	7	10.16	3	10.16	9	10.16	6
10.2	13	10.2	10	10.2	12	10.2	10	10.2	11	10.2	7	10.2	9
10.24	6	10.24	10	10.24	13	10.24	9	10.24	8	10.24	6	10.24	6
10.28	20	10.28	8	10.28	7	10.28	16	10.28	8	10.28	10	10.28	13
10.32	17	10.32	12	10.32	12	10.32	3	10.32	11	10.32	3	10.32	16
10.36	15	10.36	11	10.36	12	10.36	7	10.36	6	10.36	4	10.36	14
10.4	9	10.4	12	10.4	7	10.4	11	10.4	5	10.4	6	10.4	12
10.44	5	10.44	9	10.44	6	10.44	10	10.44	9	10.44	2	10.44	10
10.48	8	10.48	11	10.48	5	10.48	6	10.48	5	10.48	8	10.48	8
10.52	7	10.52	13	10.52	6	10.52	6	10.52	6	10.52	4	10.52	11
10.56	5	10.56	4	10.56	9	10.56	5	10.56	5	10.56	7	10.56	4
10.6	11	10.6	7	10.6	10	10.6	9	10.6	6	10.6	7	10.6	10
10.64	3	10.64	11	10.64	6	10.64	3	10.64	8	10.64	6	10.64	8
10.68	8	10.68	4	10.68	8	10.68	12	10.68	9	10.68	9	10.68	9
10.72	11	10.72	15	10.72	9	10.72	6	10.72	7	10.72	8	10.72	8
10.76	7	10.76	12	10.76	8	10.76	8	10.76	4	10.76	6	10.76	11
10.8	6	10.8	10	10.8	11	10.8	7	10.8	8	10.8	3	10.8	12
10.84	5	10.84	15	10.84	5	10.84	6	10.84	6	10.84	7	10.84	11
10.88	12	10.88	11	10.88	10	10.88	6	10.88	5	10.88	5	10.88	7
10.92	10	10.92	6	10.92	6	10.92	7	10.92	12	10.92	7	10.92	5
10.96	11	10.96	12	10.96	12	10.96	11	10.96	7	10.96	8	10.96	15
11	9	11	14	11	13	11	10	11	9	11	15	11	15
11.04	8	11.04	10	11.04	7	11.04	5	11.04	9	11.04	7	11.04	12
11.08	8	11.08	18	11.08	12	11.08	4	11.08	11	11.08	12	11.08	14
11.12	12	11.12	10	11.12	5	11.12	6	11.12	11	11.12	10	11.12	15
11.16	17	11.16	12	11.16	8	11.16	4	11.16	5	11.16	9	11.16	8
11.2	11	11.2	14	11.2	11	11.2	13	11.2	11	11.2	11	11.2	13
11.24	17	11.24	18	11.24	6	11.24	7	11.24	12	11.24	9	11.24	12
11.28	8	11.28	16	11.28	10	11.28	11	11.28	12	11.28	5	11.28	16
11.32	15	11.32	20	11.32	12	11.32	3	11.32	16	11.32	10	11.32	11
11.36	16	11.36	10	11.36	11	11.36	10	11.36	13	11.36	7	11.36	23
11.4	13	11.4	17	11.4	9	11.4	10	11.4	18	11.4	12	11.4	19
11.44	13	11.44	17	11.44	12	11.44	8	11.44	13	11.44	11	11.44	14
11.48	23	11.48	12	11.48	7	11.48	9	11.48	20	11.48	12	11.48	18
11.52	21	11.52	24	11.52	12	11.52	8	11.52	17	11.52	19	11.52	16
11.56	27	11.56	7	11.56	15	11.56	11	11.56	22	11.56	21	11.56	19
11.6	20	11.6	15	11.6	10	11.6	11	11.6	16	11.6	21	11.6	21
11.64	16	11.64	22	11.64	12	11.64	14	11.64	17	11.64	16	11.64	25
11.68	35	11.68	15	11.68	13	11.68	15	11.68	30	11.68	19	11.68	28
11.72	45	11.72	22	11.72	14	11.72	12	11.72	31	11.72	22	11.72	34
11.76	49	11.76	20	11.76	19	11.76	11	11.76	28	11.76	27	11.76	48
11.8	52	11.8	22	11.8	7	11.8	17	11.8	42	11.8	23	11.8	59
11.84	72	11.84	25	11.84	14	11.84	20	11.84	67	11.84	39	11.84	63
11.88	65	11.88	24	11.88	5	11.88	34	11.88	55	11.88	45	11.88	83
11.92	49	11.92	31	11.92	11	11.92	43	11.92	58	11.92	46	11.92	96
11.96	65	11.96	23	11.96	12	11.96	49	11.96	32	11.96	59	11.96	77
12	53	12	13	12	13	12	50	12	40	12	54	12	82
12.04	47	12.04	31	12.04	18	12.04	40	12.04	54	12.04	49	12.04	78
12.08	45	12.08	25	12.08	13	12.08	44	12.08	35	12.08	39	12.08	56
12.12	40	12.12	20	12.12	14	12.12	49	12.12	38	12.12	39	12.12	54
12.16	30	12.16	12	12.16	9	12.16	46	12.16	35	12.16	29	12.16	46
12.2	23	12.2	27	12.2	8	12.2	31	12.2	23	12.2	37	12.2	59
12.24	23	12.24	12	12.24	9	12.24	31	12.24	14	12.24	33	12.24	28
12.28	15	12.28	12	12.28	10	12.28	19	12.28	12	12.28	15	12.28	25
12.32	15	12.32	12	12.32	13	12.32	17	12.32	12	12.32	19	12.32	11
12.36	4	12.36	10	12.36	12	12.36	17	12.36	8	12.36	16	12.36	14
12.4	14	12.4	11	12.4	7	12.4	12	12.4	9	12.4	18	12.4	14
12.44	8	12.44	10	12.44	7	12.44	10	12.44	8	12.44	8	12.44	5
12.48	7	12.48	12	12.48	12	12.48	6	12.48	6	12.48	11	12.48	10
12.52	6	12.52	8	12.52	7	12.52	9	12.52	7	12.52	3	12.52	8
12.56	11	12.56	7	12.56	8	12.56	6	12.56	6	12.56	8	12.56	4
12.6	7	12.6	10	12.6	9	12.6	15	12.6	8	12.6	8	12.6	9
12.64	7	12.64	8	12.64	9	12.64	3	12.64	15	12.64	3	12.64	6
12.68	10	12.68	11	12.68	9	12.68	2	12.68	5	12.68	9	12.68	7
12.72	5	12.72	10	12.72	8	12.72	9	12.72	10	12.72	3	12.72	10
12.76	6	12.76	11	12.76	10	12.76	9	12.76	10	12.76	7	12.76	8
12.8	6	12.8	8	12.8	5	12.8	5	12.8	12	12.8	10	12.8	5
12.84	8	12.84	12	12.84	3	12.84	5	12.84	11	12.84	8	12.84	6
12.88	2	12.88	6	12.88	13	12.88	7	12.88	14	12.88	8	12.88	5
12.92	2	12.92	8	12.92	5	12.92	9	12.92	10	12.92	11	12.92	4
12.96	9	12.96	5	12.96	3	12.96	8	12.96	8	12.96	8	12.96	8
13	8	13	9	13	6	13	8	13	8	13	5	13	5
13.04	6	13.04	9	13.04	7	13.04	2	13.04	5	13.04	5	13.04	4
13.08	7	13.08	11	13.08	8	13.08	8	13.08	4	13.08	8	13.08	6
13.12	8	13.12	5	13.12	7	13.12	5	13.12	10	13.12	6	13.12	4
13.16	5	13.16	4	13.16	4	13.16	6	13.16	10	13.16	8	13.16	5
13.2	5	13.2	7	13.2	2	13.2	5	13.2	7	13.2	7	13.2	4
13.24	8	13.24	7	13.24	6	13.24	5	13.24	12	13.24	6	13.24	7
13.28	2	13.28	6	13.28	6	13.28	6	13.28	5	13.28	9	13.28	8
13.32	3	13.32	7	13.32	4	13.32	4	13.32	5	13.32	5	13.32	8
13.36	11	13.36	7	13.36	7	13.36	9	13.36	6	13.36	8	13.36	6
13.4	8	13.4	4	13.4	8	13.4	2	13.4	5	13.4	4	13.4	5
13.44	4	13.44	6	13.44	6	13.44	2	13.44	8	13.44	5	13.44	8
13.48	6	13.48	4	13.48	1	13.48	1	13.48	13	13.48	4	13.48	3
13.52	6	13.52	12	13.52	4	13.52	8	13.52	8	13.52	8	13.52	11
13.56	7	13.56	4	13.56	10	13.56	7	13.56	6	13.56	11	13.56	3
13.6	7	13.6	11	13.6	9	13.6	5	13.6	4	13.6	6	13.6	1
13.64	4	13.64	5	13.64	6	13.64	5	13.64	10	13.64	5	13.64	6
13.68	7	13.68	5	13.68	5	13.68	2	13.68	5	13.68	6	13.68	5
13.72	4	13.72	6	13.72	4	13.72	5	13.72	11	13.72	5	13.72	3
13.76	10	13.76	6	13.76	4	13.76	5	13.76	5	13.76	9	13.76	7
13.8	2	13.8	1	13.8	7	13.8	6	13.8	7	13.8	7	13.8	3
13.84	8	13.84	13	13.84	8	13.84	7	13.84	3	13.84	9	13.84	6
13.88	10	13.88	6	13.88	6	13.88	4	13.88	9	13.88	4	13.88	2
13.92	9	13.92	10	13.92	8	13.92	3	13.92	8	13.92	6	13.92	4
13.96	1	13.96	5	13.96	4	13.96	8	13.96	7	13.96	7	13.96	5
14	3	14	10	14	10	14	4	14	9	14	5	14	5
14.04	5	14.04	7	14.04	3	14.04	8	14.04	9	14.04	4	14.04	4
14.08	3	14.08	8	14.08	8	14.08	5	14.08	4	14.08	3	14.08	4
14.12	5	14.12	10	14.12	10	14.12	2	14.12	5	14.12	8	14.12	2
14.16	5	14.16	8	14.16	5	14.16	7	14.16	4	14.16	9	14.16	6
14.2	6	14.2	4	14.2	7	14.2	10	14.2	6	14.2	11	14.2	3
14.24	3	14.24	10	14.24	7	14.24	7	14.24	6	14.24	8	14.24	5
14.28	4	14.28	4	14.28	7	14.28	7	14.28	6	14.28	3	14.28	3
14.32	3	14.32	3	14.32	8	14.32	7	14.32	5	14.32	2	14.32	9
14.36	7	14.36	9	14.36	4	14.36	4	14.36	8	14.36	1	14.36	4
14.4	5	14.4	4	14.4	7	14.4	6	14.4	9	14.4	8	14.4	4
14.44	7	14.44	6	14.44	8	14.44	3	14.44	9	14.44	6	14.44	5
14.48	1	14.48	3	14.48	8	14.48	4	14.48	8	14.48	5	14.48	8
14.52	9	14.52	1	14.52	8	14.52	3	14.52	5	14.52	4	14.52	4
14.56	5	14.56	8	14.56	10	14.56	2	14.56	8	14.56	7	14.56	1
14.6	5	14.6	4	14.6	9	14.6	3	14.6	3	14.6	8	14.6	5
14.64	7	14.64	2	14.64	10	14.64	7	14.64	5	14.64	3	14.64	4
14.68	3	14.68	6	14.68	10	14.68	6	14.68	8	14.68	8	14.68	4
14.72	8	14.72	8	14.72	8	14.72	6	14.72	6	14.72	5	14.72	3
14.76	3	14.76	3	14.76	11	14.76	4	14.76	4	14.76	5	14.76	3
14.8	8	14.8	6	14.8	9	14.8	2	14.8	7	14.8	9	14.8	7
14.84	8	14.84	6	14.84	7	14.84	8	14.84	4	14.84	4	14.84	3
14.88	9	14.88	5	14.88	7	14.88	4	14.88	12	14.88	8	14.88	3
14.92	4	14.92	4	14.92	7	14.92	4	14.92	7	14.92	9	14.92	5
14.96	7	14.96	8	14.96	4	14.96	5	14.96	3	14.96	4	14.96	1
15	4	15	4	15	7	15	9	15	6	15	15	15	5
15.04	4	15.04	11	15.04	10	15.04	8	15.04	11	15.04	4	15.04	3
15.08	8	15.08	7	15.08	8	15.08	8	15.08	11	15.08	7	15.08	3
15.12	1	15.12	5	15.12	3	15.12	2	15.12	10	15.12	10	15.12	5
15.16	5	15.16	6	15.16	4	15.16	2	15.16	11	15.16	3	15.16	4
15.2	4	15.2	2	15.2	5	15.2	3	15.2	9	15.2	2	15.2	3
15.24	2	15.24	10	15.24	6	15.24	3	15.24	7	15.24	6	15.24	3
15.28	9	15.28	4	15.28	10	15.28	3	15.28	7	15.28	5	15.28	9
15.32	5	15.32	5	15.32	8	15.32	5	15.32	7	15.32	6	15.32	6
15.36	4	15.36	8	15.36	8	15.36	9	15.36	9	15.36	6	15.36	4
15.4	7	15.4	4	15.4	4	15.4	6	15.4	10	15.4	8	15.4	9
15.44	5	15.44	5	15.44	8	15.44	2	15.44	11	15.44	8	15.44	4
15.48	5	15.48	7	15.48	6	15.48	9	15.48	4	15.48	8	15.48	3
15.52	7	15.52	10	15.52	8	15.52	8	15.52	6	15.52	10	15.52	3
15.56	3	15.56	6	15.56	6	15.56	9	15.56	8	15.56	13	15.56	9
15.6	6	15.6	4	15.6	5	15.6	10	15.6	8	15.6	4	15.6	7
15.64	6	15.64	1	15.64	11	15.64	3	15.64	5	15.64	7	15.64	2
15.68	5	15.68	2	15.68	8	15.68	8	15.68	9	15.68	6	15.68	4
15.72	5	15.72	7	15.72	3	15.72	5	15.72	8	15.72	3	15.72	7
15.76	4	15.76	7	15.76	4	15.76	4	15.76	8	15.76	5	15.76	10
15.8	4	15.8	6	15.8	6	15.8	3	15.8	9	15.8	9	15.8	5
15.84	7	15.84	9	15.84	5	15.84	8	15.84	11	15.84	9	15.84	2
15.88	10	15.88	6	15.88	9	15.88	5	15.88	10	15.88	6	15.88	7
15.92	7	15.92	4	15.92	8	15.92	10	15.92	6	15.92	8	15.92	3
15.96	2	15.96	2	15.96	1	15.96	5	15.96	9	15.96	4	15.96	4
16	1	16	5	16	7	16	2	16	10	16	5	16	5
16.04	7	16.04	4	16.04	5	16.04	7	16.04	4	16.04	6	16.04	2
16.08	2	16.08	7	16.08	5	16.08	3	16.08	10	16.08	5	16.08	5
16.12	6	16.12	8	16.12	4	16.12	7	16.12	5	16.12	3	16.12	5
16.16	4	16.16	3	16.16	4	16.16	4	16.16	11	16.16	10	16.16	7
16.2	8	16.2	8	16.2	7	16.2	9	16.2	8	16.2	7	16.2	7
16.24	5	16.24	3	16.24	12	16.24	7	16.24	6	16.24	6	16.24	12
16.28	3	16.28	3	16.28	11	16.28	9	16.28	12	16.28	6	16.28	3
16.32	3	16.32	5	16.32	5	16.32	4	16.32	6	16.32	6	16.32	5
16.36	3	16.36	10	16.36	8	16.36	10	16.36	7	16.36	5	16.36	6
16.4	6	16.4	4	16.4	3	16.4	6	16.4	16	16.4	8	16.4	3
16.44	3	16.44	8	16.44	5	16.44	9	16.44	6	16.44	1	16.44	6
16.48	7	16.48	3	16.48	5	16.48	7	16.48	9	16.48	7	16.48	2
16.52	7	16.52	8	16.52	6	16.52	4	16.52	9	16.52	5	16.52	4
16.56	6	16.56	6	16.56	13	16.56	11	16.56	5	16.56	5	16.56	4
16.6	5	16.6	8	16.6	8	16.6	6	16.6	11	16.6	6	16.6	6
16.64	4	16.64	5	16.64	8	16.64	5	16.64	4	16.64	4	16.64	8
16.68	4	16.68	2	16.68	7	16.68	7	16.68	8	16.68	1	16.68	7
16.72	2	16.72	8	16.72	6	16.72	9	16.72	9	16.72	8	16.72	4
16.76	4	16.76	10	16.76	9	16.76	11	16.76	16	16.76	7	16.76	6
16.8	8	16.8	17	16.8	11	16.8	6	16.8	13	16.8	3	16.8	8
16.84	12	16.84	40	16.84	10	16.84	5	16.84	15	16.84	2	16.84	5
16.88	10	16.88	26	16.88	7	16.88	7	16.88	9	16.88	5	16.88	6
16.92	7	16.92	6	16.92	17	16.92	9	16.92	6	16.92	8	16.92	5
16.96	8	16.96	4	16.96	8	16.96	19	16.96	6	16.96	4	16.96	8
17	5	17	7	17	9	17	25	17	10	17	10	17	5
17.04	4	17.04	10	17.04	4	17.04	5	17.04	6	17.04	8	17.04	6
17.08	9	17.08	9	17.08	17	17.08	5	17.08	10	17.08	7	17.08	3
17.12	4	17.12	5	17.12	7	17.12	4	17.12	15	17.12	7	17.12	2
17.16	6	17.16	6	17.16	8	17.16	5	17.16	8	17.16	5	17.16	4
17.2	5	17.2	7	17.2	4	17.2	9	17.2	11	17.2	6	17.2	12
17.24	7	17.24	7	17.24	5	17.24	10	17.24	12	17.24	10	17.24	11
17.28	6	17.28	5	17.28	10	17.28	13	17.28	15	17.28	4	17.28	7
17.32	9	17.32	5	17.32	9	17.32	8	17.32	13	17.32	10	17.32	2
17.36	3	17.36	10	17.36	6	17.36	13	17.36	14	17.36	7	17.36	5
17.4	6	17.4	7	17.4	7	17.4	12	17.4	10	17.4	7	17.4	3
17.44	6	17.44	8	17.44	8	17.44	5	17.44	6	17.44	6	17.44	4
17.48	4	17.48	8	17.48	4	17.48	12	17.48	10	17.48	10	17.48	2
17.52	6	17.52	9	17.52	10	17.52	7	17.52	10	17.52	7	17.52	2
17.56	8	17.56	8	17.56	11	17.56	6	17.56	19	17.56	11	17.56	5
17.6	5	17.6	11	17.6	12	17.6	6	17.6	17	17.6	5	17.6	6
17.64	7	17.64	10	17.64	5	17.64	13	17.64	15	17.64	5	17.64	7
17.68	6	17.68	11	17.68	9	17.68	2	17.68	17	17.68	10	17.68	6
17.72	10	17.72	9	17.72	15	17.72	10	17.72	14	17.72	6	17.72	13
17.76	4	17.76	10	17.76	9	17.76	3	17.76	17	17.76	14	17.76	7
17.8	11	17.8	8	17.8	3	17.8	12	17.8	11	17.8	11	17.8	16
17.84	9	17.84	12	17.84	14	17.84	11	17.84	15	17.84	13	17.84	13
17.88	10	17.88	13	17.88	9	17.88	12	17.88	21	17.88	16	17.88	15
17.92	9	17.92	9	17.92	5	17.92	11	17.92	20	17.92	8	17.92	12
17.96	17	17.96	12	17.96	4	17.96	6	17.96	23	17.96	8	17.96	15
18	13	18	7	18	11	18	11	18	15	18	14	18	16
18.04	15	18.04	7	18.04	12	18.04	15	18.04	18	18.04	15	18.04	20
18.08	15	18.08	5	18.08	10	18.08	16	18.08	11	18.08	15	18.08	23
18.12	4	18.12	9	18.12	10	18.12	16	18.12	19	18.12	19	18.12	25
18.16	19	18.16	14	18.16	10	18.16	12	18.16	13	18.16	14	18.16	12
18.2	16	18.2	10	18.2	9	18.2	13	18.2	10	18.2	14	18.2	10
18.24	11	18.24	12	18.24	9	18.24	8	18.24	20	18.24	15	18.24	10
18.28	15	18.28	12	18.28	13	18.28	15	18.28	12	18.28	14	18.28	10
18.32	8	18.32	3	18.32	12	18.32	14	18.32	21	18.32	12	18.32	10
18.36	13	18.36	7	18.36	8	18.36	14	18.36	18	18.36	10	18.36	5
18.4	8	18.4	6	18.4	10	18.4	8	18.4	21	18.4	13	18.4	15
18.44	8	18.44	8	18.44	15	18.44	7	18.44	9	18.44	14	18.44	11
18.48	7	18.48	12	18.48	11	18.48	6	18.48	26	18.48	10	18.48	12
18.52	9	18.52	14	18.52	13	18.52	8	18.52	26	18.52	18	18.52	13
18.56	17	18.56	14	18.56	13	18.56	11	18.56	14	18.56	10	18.56	12
18.6	15	18.6	18	18.6	3	18.6	9	18.6	27	18.6	9	18.6	18
18.64	14	18.64	13	18.64	13	18.64	3	18.64	22	18.64	15	18.64	15
18.68	26	18.68	16	18.68	9	18.68	15	18.68	21	18.68	11	18.68	17
18.72	25	18.72	7	18.72	9	18.72	15	18.72	23	18.72	14	18.72	13
18.76	22	18.76	11	18.76	12	18.76	18	18.76	20	18.76	19	18.76	18
18.8	17	18.8	11	18.8	10	18.8	14	18.8	17	18.8	17	18.8	21
18.84	9	18.84	20	18.84	7	18.84	17	18.84	18	18.84	14	18.84	13
18.88	21	18.88	18	18.88	12	18.88	20	18.88	25	18.88	13	18.88	15
18.92	11	18.92	15	18.92	18	18.92	10	18.92	15	18.92	18	18.92	23
18.96	12	18.96	16	18.96	13	18.96	19	18.96	17	18.96	16	18.96	15
19	17	19	23	19	13	19	13	19	23	19	17	19	15
19.04	16	19.04	9	19.04	18	19.04	15	19.04	12	19.04	13	19.04	32
19.08	14	19.08	12	19.08	17	19.08	13	19.08	18	19.08	15	19.08	12
19.12	14	19.12	10	19.12	12	19.12	15	19.12	24	19.12	18	19.12	18
19.16	18	19.16	19	19.16	16	19.16	19	19.16	15	19.16	27	19.16	16
19.2	15	19.2	6	19.2	15	19.2	17	19.2	15	19.2	18	19.2	22
19.24	14	19.24	16	19.24	17	19.24	19	19.24	21	19.24	13	19.24	13
19.28	10	19.28	16	19.28	14	19.28	9	19.28	23	19.28	15	19.28	22
19.32	17	19.32	7	19.32	17	19.32	12	19.32	22	19.32	13	19.32	13
19.36	15	19.36	20	19.36	11	19.36	17	19.36	12	19.36	21	19.36	20
19.4	14	19.4	16	19.4	8	19.4	10	19.4	14	19.4	18	19.4	16
19.44	17	19.44	17	19.44	15	19.44	8	19.44	16	19.44	13	19.44	12
19.48	12	19.48	16	19.48	13	19.48	22	19.48	10	19.48	55	19.48	11
19.52	14	19.52	9	19.52	14	19.52	11	19.52	15	19.52	41	19.52	5
19.56	11	19.56	6	19.56	7	19.56	6	19.56	18	19.56	19	19.56	22
19.6	15	19.6	13	19.6	18	19.6	18	19.6	18	19.6	12	19.6	12
19.64	12	19.64	10	19.64	16	19.64	16	19.64	12	19.64	15	19.64	10
19.68	7	19.68	15	19.68	14	19.68	12	19.68	26	19.68	7	19.68	11
19.72	15	19.72	13	19.72	8	19.72	7	19.72	12	19.72	15	19.72	7
19.76	9	19.76	19	19.76	11	19.76	11	19.76	10	19.76	11	19.76	12
19.8	1	19.8	10	19.8	14	19.8	15	19.8	13	19.8	15	19.8	8
19.84	13	19.84	8	19.84	11	19.84	12	19.84	17	19.84	7	19.84	8
19.88	10	19.88	8	19.88	14	19.88	13	19.88	11	19.88	15	19.88	10
19.92	13	19.92	9	19.92	15	19.92	12	19.92	14	19.92	13	19.92	9
19.96	10	19.96	9	19.96	10	19.96	8	19.96	16	19.96	12	19.96	19
20	8	20	11	20	9	20	10	20	14	20	10	20	8
20.04	11	20.04	9	20.04	13	20.04	13	20.04	14	20.04	8	20.04	7
20.08	11	20.08	12	20.08	15	20.08	11	20.08	15	20.08	14	20.08	7
20.12	14	20.12	12	20.12	16	20.12	8	20.12	14	20.12	19	20.12	9
20.16	11	20.16	14	20.16	13	20.16	11	20.16	16	20.16	9	20.16	9
20.2	8	20.2	12	20.2	8	20.2	10	20.2	13	20.2	13	20.2	10
20.24	10	20.24	15	20.24	9	20.24	12	20.24	18	20.24	10	20.24	10
20.28	18	20.28	11	20.28	18	20.28	11	20.28	12	20.28	15	20.28	6
20.32	9	20.32	8	20.32	14	20.32	9	20.32	17	20.32	11	20.32	12
20.36	13	20.36	10	20.36	7	20.36	13	20.36	16	20.36	14	20.36	12
20.4	8	20.4	9	20.4	13	20.4	13	20.4	24	20.4	8	20.4	7
20.44	15	20.44	9	20.44	10	20.44	7	20.44	12	20.44	19	20.44	8
20.48	8	20.48	10	20.48	10	20.48	11	20.48	13	20.48	10	20.48	12
20.52	13	20.52	8	20.52	17	20.52	11	20.52	18	20.52	13	20.52	12
20.56	14	20.56	8	20.56	7	20.56	8	20.56	19	20.56	12	20.56	14
20.6	5	20.6	10	20.6	11	20.6	13	20.6	16	20.6	11	20.6	11
20.64	11	20.64	10	20.64	11	20.64	13	20.64	11	20.64	9	20.64	7
20.68	16	20.68	8	20.68	17	20.68	10	20.68	15	20.68	9	20.68	9
20.72	11	20.72	12	20.72	11	20.72	8	20.72	23	20.72	10	20.72	15
20.76	5	20.76	7	20.76	18	20.76	11	20.76	18	20.76	12	20.76	9
20.8	10	20.8	10	20.8	9	20.8	12	20.8	12	20.8	10	20.8	12
20.84	8	20.84	13	20.84	10	20.84	17	20.84	19	20.84	17	20.84	12
20.88	14	20.88	11	20.88	6	20.88	9	20.88	15	20.88	10	20.88	5
20.92	11	20.92	5	20.92	7	20.92	6	20.92	19	20.92	18	20.92	5
20.96	6	20.96	5	20.96	13	20.96	12	20.96	20	20.96	12	20.96	9
21	5	21	13	21	11	21	9	21	23	21	12	21	8
21.04	9	21.04	8	21.04	10	21.04	8	21.04	15	21.04	15	21.04	11
21.08	16	21.08	9	21.08	11	21.08	10	21.08	19	21.08	14	21.08	16
21.12	13	21.12	12	21.12	15	21.12	12	21.12	21	21.12	14	21.12	8
21.16	5	21.16	13	21.16	10	21.16	12	21.16	22	21.16	15	21.16	10
21.2	4	21.2	8	21.2	15	21.2	9	21.2	21	21.2	18	21.2	13
21.24	18	21.24	14	21.24	12	21.24	8	21.24	19	21.24	16	21.24	11
21.28	15	21.28	9	21.28	12	21.28	13	21.28	12	21.28	13	21.28	10
21.32	12	21.32	15	21.32	15	21.32	8	21.32	30	21.32	12	21.32	12
21.36	18	21.36	6	21.36	7	21.36	14	21.36	20	21.36	19	21.36	11
21.4	14	21.4	13	21.4	21	21.4	9	21.4	21	21.4	16	21.4	15
21.44	15	21.44	6	21.44	23	21.44	9	21.44	17	21.44	12	21.44	12
21.48	7	21.48	12	21.48	17	21.48	11	21.48	14	21.48	21	21.48	4
21.52	11	21.52	9	21.52	10	21.52	9	21.52	21	21.52	16	21.52	6
21.56	10	21.56	13	21.56	13	21.56	13	21.56	13	21.56	14	21.56	10
21.6	9	21.6	6	21.6	14	21.6	7	21.6	14	21.6	10	21.6	9
21.64	5	21.64	12	21.64	15	21.64	14	21.64	22	21.64	17	21.64	13
21.68	6	21.68	10	21.68	13	21.68	14	21.68	14	21.68	13	21.68	11
21.72	12	21.72	6	21.72	14	21.72	10	21.72	27	21.72	18	21.72	8
21.76	10	21.76	10	21.76	13	21.76	12	21.76	19	21.76	14	21.76	3
21.8	3	21.8	12	21.8	9	21.8	8	21.8	19	21.8	11	21.8	10
21.84	7	21.84	7	21.84	8	21.84	9	21.84	21	21.84	18	21.84	9
21.88	8	21.88	6	21.88	18	21.88	13	21.88	19	21.88	9	21.88	8
21.92	8	21.92	13	21.92	11	21.92	12	21.92	18	21.92	12	21.92	8
21.96	10	21.96	15	21.96	12	21.96	10	21.96	12	21.96	11	21.96	11
22	7	22	16	22	15	22	17	22	18	22	6	22	6
22.04	10	22.04	14	22.04	12	22.04	6	22.04	19	22.04	15	22.04	8
22.08	17	22.08	8	22.08	16	22.08	17	22.08	18	22.08	19	22.08	14
22.12	49	22.12	16	22.12	14	22.12	8	22.12	25	22.12	12	22.12	35
22.16	60	22.16	30	22.16	22	22.16	14	22.16	18	22.16	12	22.16	27
22.2	41	22.2	20	22.2	20	22.2	13	22.2	24	22.2	14	22.2	31
22.24	14	22.24	15	22.24	21	22.24	10	22.24	21	22.24	17	22.24	10
22.28	19	22.28	14	22.28	10	22.28	21	22.28	23	22.28	11	22.28	16
22.32	16	22.32	7	22.32	18	22.32	11	22.32	12	22.32	17	22.32	10
22.36	10	22.36	11	22.36	12	22.36	18	22.36	26	22.36	13	22.36	13
22.4	10	22.4	16	22.4	13	22.4	8	22.4	21	22.4	12	22.4	5
22.44	14	22.44	8	22.44	17	22.44	15	22.44	12	22.44	19	22.44	6
22.48	12	22.48	12	22.48	10	22.48	19	22.48	17	22.48	22	22.48	12
22.52	8	22.52	11	22.52	17	22.52	16	22.52	21	22.52	16	22.52	15
22.56	7	22.56	18	22.56	13	22.56	8	22.56	20	22.56	25	22.56	6
22.6	12	22.6	6	22.6	12	22.6	6	22.6	17	22.6	24	22.6	11
22.64	12	22.64	11	22.64	12	22.64	9	22.64	21	22.64	9	22.64	14
22.68	12	22.68	12	22.68	8	22.68	18	22.68	14	22.68	15	22.68	6
22.72	8	22.72	12	22.72	16	22.72	7	22.72	17	22.72	16	22.72	9
22.76	9	22.76	12	22.76	12	22.76	11	22.76	16	22.76	19	22.76	6
22.8	20	22.8	10	22.8	15	22.8	10	22.8	13	22.8	11	22.8	12
22.84	7	22.84	12	22.84	13	22.84	6	22.84	17	22.84	8	22.84	13
22.88	11	22.88	10	22.88	16	22.88	13	22.88	29	22.88	17	22.88	10
22.92	4	22.92	12	22.92	10	22.92	9	22.92	15	22.92	17	22.92	13
22.96	19	22.96	14	22.96	10	22.96	17	22.96	22	22.96	12	22.96	9
23	16	23	14	23	12	23	16	23	22	23	15	23	12
23.04	7	23.04	18	23.04	19	23.04	11	23.04	14	23.04	20	23.04	9
23.08	16	23.08	10	23.08	17	23.08	15	23.08	16	23.08	13	23.08	14
23.12	17	23.12	17	23.12	20	23.12	11	23.12	20	23.12	11	23.12	16
23.16	11	23.16	16	23.16	14	23.16	14	23.16	21	23.16	21	23.16	16
23.2	16	23.2	10	23.2	20	23.2	18	23.2	17	23.2	16	23.2	14
23.24	16	23.24	11	23.24	23	23.24	14	23.24	17	23.24	12	23.24	11
23.28	13	23.28	17	23.28	17	23.28	20	23.28	26	23.28	14	23.28	16
23.32	18	23.32	12	23.32	15	23.32	15	23.32	30	23.32	16	23.32	17
23.36	21	23.36	20	23.36	15	23.36	11	23.36	19	23.36	15	23.36	20
23.4	18	23.4	17	23.4	19	23.4	17	23.4	23	23.4	24	23.4	17
23.44	15	23.44	15	23.44	7	23.44	18	23.44	23	23.44	19	23.44	21
23.48	21	23.48	19	23.48	19	23.48	16	23.48	22	23.48	22	23.48	20
23.52	24	23.52	14	23.52	14	23.52	8	23.52	33	23.52	20	23.52	31
23.56	21	23.56	20	23.56	21	23.56	17	23.56	39	23.56	24	23.56	31
23.6	44	23.6	21	23.6	20	23.6	23	23.6	37	23.6	26	23.6	37
23.64	35	23.64	19	23.64	27	23.64	22	23.64	49	23.64	29	23.64	41
23.68	49	23.68	29	23.68	18	23.68	35	23.68	36	23.68	27	23.68	46
23.72	33	23.72	20	23.72	19	23.72	28	23.72	27	23.72	41	23.72	46
23.76	30	23.76	20	23.76	14	23.76	46	23.76	44	23.76	36	23.76	45
23.8	27	23.8	17	23.8	25	23.8	31	23.8	41	23.8	28	23.8	44
23.84	32	23.84	17	23.84	19	23.84	29	23.84	26	23.84	24	23.84	42
23.88	23	23.88	18	23.88	21	23.88	29	23.88	31	23.88	35	23.88	27
23.92	22	23.92	26	23.92	26	23.92	31	23.92	34	23.92	33	23.92	38
23.96	22	23.96	20	23.96	31	23.96	22	23.96	28	23.96	34	23.96	39
24	30	24	19	24	13	24	36	24	41	24	23	24	30
24.04	44	24.04	23	24.04	17	24.04	28	24.04	34	24.04	38	24.04	26
24.08	21	24.08	18	24.08	17	24.08	26	24.08	38	24.08	30	24.08	35
24.12	40	24.12	16	24.12	16	24.12	24	24.12	36	24.12	26	24.12	28
24.16	30	24.16	22	24.16	16	24.16	33	24.16	32	24.16	31	24.16	36
24.2	29	24.2	20	24.2	14	24.2	20	24.2	25	24.2	33	24.2	36
24.24	28	24.24	11	24.24	20	24.24	14	24.24	37	24.24	22	24.24	40
24.28	30	24.28	18	24.28	20	24.28	22	24.28	26	24.28	24	24.28	36
24.32	14	24.32	23	24.32	27	24.32	27	24.32	20	24.32	32	24.32	23
24.36	23	24.36	14	24.36	18	24.36	30	24.36	25	24.36	38	24.36	28
24.4	18	24.4	10	24.4	7	24.4	30	24.4	29	24.4	27	24.4	15
24.44	8	24.44	11	24.44	13	24.44	29	24.44	30	24.44	25	24.44	21
24.48	11	24.48	27	24.48	25	24.48	19	24.48	24	24.48	14	24.48	8
24.52	13	24.52	10	24.52	19	24.52	5	24.52	21	24.52	14	24.52	15
24.56	13	24.56	18	24.56	11	24.56	13	24.56	13	24.56	14	24.56	15
24.6	11	24.6	11	24.6	9	24.6	22	24.6	13	24.6	23	24.6	27
24.64	17	24.64	17	24.64	16	24.64	20	24.64	26	24.64	21	24.64	38
24.68	10	24.68	13	24.68	20	24.68	17	24.68	18	24.68	17	24.68	21
24.72	12	24.72	11	24.72	21	24.72	19	24.72	20	24.72	14	24.72	19
24.76	19	24.76	18	24.76	13	24.76	8	24.76	25	24.76	17	24.76	9
24.8	13	24.8	9	24.8	12	24.8	9	24.8	11	24.8	19	24.8	14
24.84	12	24.84	11	24.84	11	24.84	7	24.84	21	24.84	16	24.84	9
24.88	6	24.88	7	24.88	12	24.88	11	24.88	20	24.88	8	24.88	6
24.92	8	24.92	10	24.92	14	24.92	7	24.92	19	24.92	16	24.92	18
24.96	7	24.96	10	24.96	7	24.96	10	24.96	16	24.96	11	24.96	13
25	6	25	9	25	9	25	12	25	11	25	7	25	9
25.04	7	25.04	11	25.04	26	25.04	13	25.04	15	25.04	10	25.04	6
25.08	11	25.08	12	25.08	13	25.08	11	25.08	16	25.08	9	25.08	6
25.12	11	25.12	10	25.12	8	25.12	13	25.12	23	25.12	11	25.12	8
25.16	5	25.16	13	25.16	16	25.16	13	25.16	21	25.16	12	25.16	3
25.2	10	25.2	11	25.2	12	25.2	9	25.2	18	25.2	14	25.2	6
25.24	6	25.24	8	25.24	14	25.24	8	25.24	20	25.24	19	25.24	5
25.28	6	25.28	10	25.28	15	25.28	9	25.28	15	25.28	14	25.28	11
25.32	13	25.32	9	25.32	8	25.32	5	25.32	11	25.32	12	25.32	5
25.36	4	25.36	10	25.36	12	25.36	5	25.36	19	25.36	13	25.36	7
25.4	11	25.4	3	25.4	6	25.4	11	25.4	26	25.4	19	25.4	7
25.44	21	25.44	9	25.44	9	25.44	8	25.44	15	25.44	12	25.44	11
25.48	13	25.48	14	25.48	10	25.48	15	25.48	20	25.48	16	25.48	8
25.52	17	25.52	13	25.52	19	25.52	8	25.52	18	25.52	7	25.52	12
25.56	4	25.56	11	25.56	13	25.56	8	25.56	15	25.56	14	25.56	8
25.6	12	25.6	8	25.6	12	25.6	16	25.6	16	25.6	9	25.6	8
25.64	11	25.64	2	25.64	5	25.64	12	25.64	19	25.64	11	25.64	11
25.68	11	25.68	16	25.68	9	25.68	16	25.68	21	25.68	13	25.68	6
25.72	12	25.72	6	25.72	10	25.72	11	25.72	23	25.72	12	25.72	8
25.76	15	25.76	11	25.76	11	25.76	11	25.76	24	25.76	21	25.76	9
25.8	14	25.8	7	25.8	8	25.8	12	25.8	85	25.8	13	25.8	9
25.84	12	25.84	16	25.84	11	25.84	10	25.84	67	25.84	17	25.84	12
25.88	11	25.88	14	25.88	9	25.88	13	25.88	75	25.88	16	25.88	5
25.92	8	25.92	10	25.92	11	25.92	15	25.92	16	25.92	11	25.92	10
25.96	9	25.96	4	25.96	15	25.96	16	25.96	15	25.96	10	25.96	10
26	4	26	7	26	12	26	16	26	12	26	11	26	4
26.04	10	26.04	10	26.04	17	26.04	7	26.04	14	26.04	15	26.04	9
26.08	7	26.08	8	26.08	13	26.08	13	26.08	18	26.08	12	26.08	11
26.12	11	26.12	3	26.12	11	26.12	6	26.12	12	26.12	10	26.12	7
26.16	9	26.16	12	26.16	10	26.16	13	26.16	15	26.16	15	26.16	7
26.2	6	26.2	5	26.2	5	26.2	10	26.2	22	26.2	13	26.2	7
26.24	10	26.24	10	26.24	17	26.24	11	26.24	17	26.24	11	26.24	10
26.28	9	26.28	7	26.28	4	26.28	7	26.28	12	26.28	13	26.28	7
26.32	8	26.32	13	26.32	11	26.32	12	26.32	13	26.32	14	26.32	7
26.36	14	26.36	9	26.36	12	26.36	12	26.36	25	26.36	10	26.36	7
26.4	10	26.4	13	26.4	18	26.4	13	26.4	12	26.4	20	26.4	15
26.44	7	26.44	9	26.44	5	26.44	18	26.44	13	26.44	14	26.44	10
26.48	6	26.48	8	26.48	11	26.48	10	26.48	20	26.48	14	26.48	9
26.52	9	26.52	15	26.52	10	26.52	15	26.52	19	26.52	7	26.52	14
26.56	7	26.56	9	26.56	10	26.56	7	26.56	23	26.56	6	26.56	14
26.6	9	26.6	16	26.6	12	26.6	14	26.6	30	26.6	17	26.6	7
26.64	10	26.64	10	26.64	12	26.64	7	26.64	22	26.64	8	26.64	11
26.68	14	26.68	10	26.68	12	26.68	9	26.68	14	26.68	7	26.68	7
26.72	26	26.72	20	26.72	15	26.72	11	26.72	23	26.72	14	26.72	17
26.76	22	26.76	21	26.76	15	26.76	13	26.76	28	26.76	9	26.76	26
26.8	20	26.8	25	26.8	16	26.8	22	26.8	13	26.8	9	26.8	48
26.84	21	26.84	16	26.84	19	26.84	23	26.84	23	26.84	12	26.84	32
26.88	9	26.88	14	26.88	15	26.88	12	26.88	14	26.88	15	26.88	36
26.92	8	26.92	18	26.92	12	26.92	7	26.92	19	26.92	17	26.92	16
26.96	11	26.96	13	26.96	20	26.96	9	26.96	22	26.96	12	26.96	19
27	12	27	2	27	14	27	11	27	23	27	13	27	8
27.04	10	27.04	12	27.04	12	27.04	9	27.04	17	27.04	12	27.04	20
27.08	9	27.08	21	27.08	18	27.08	26	27.08	18	27.08	14	27.08	4
27.12	20	27.12	12	27.12	13	27.12	26	27.12	20	27.12	14	27.12	11
27.16	13	27.16	12	27.16	11	27.16	25	27.16	21	27.16	18	27.16	7
27.2	10	27.2	9	27.2	11	27.2	32	27.2	14	27.2	9	27.2	7
27.24	6	27.24	12	27.24	9	27.24	35	27.24	19	27.24	19	27.24	4
27.28	5	27.28	7	27.28	5	27.28	27	27.28	23	27.28	15	27.28	11
27.32	7	27.32	14	27.32	20	27.32	17	27.32	16	27.32	11	27.32	6
27.36	7	27.36	7	27.36	16	27.36	10	27.36	18	27.36	8	27.36	4
27.4	7	27.4	2	27.4	15	27.4	11	27.4	12	27.4	12	27.4	4
27.44	5	27.44	12	27.44	16	27.44	3	27.44	16	27.44	12	27.44	4
27.48	5	27.48	8	27.48	10	27.48	9	27.48	17	27.48	8	27.48	10
27.52	8	27.52	13	27.52	8	27.52	13	27.52	17	27.52	11	27.52	8
27.56	11	27.56	15	27.56	12	27.56	3	27.56	18	27.56	6	27.56	6
27.6	13	27.6	11	27.6	10	27.6	8	27.6	15	27.6	10	27.6	8
27.64	20	27.64	9	27.64	13	27.64	8	27.64	16	27.64	9	27.64	15
27.68	10	27.68	12	27.68	11	27.68	10	27.68	17	27.68	13	27.68	13
27.72	5	27.72	10	27.72	13	27.72	7	27.72	14	27.72	10	27.72	6
27.76	6	27.76	10	27.76	10	27.76	11	27.76	15	27.76	12	27.76	4
27.8	3	27.8	8	27.8	12	27.8	10	27.8	11	27.8	9	27.8	9
27.84	5	27.84	8	27.84	12	27.84	10	27.84	11	27.84	10	27.84	5
27.88	4	27.88	7	27.88	16	27.88	7	27.88	16	27.88	15	27.88	9
27.92	6	27.92	2	27.92	10	27.92	8	27.92	19	27.92	16	27.92	6
27.96	9	27.96	5	27.96	5	27.96	10	27.96	20	27.96	8	27.96	3
28	5	28	11	28	12	28	15	28	12	28	10	28	3
28.04	5	28.04	14	28.04	10	28.04	12	28.04	16	28.04	9	28.04	3
28.08	9	28.08	7	28.08	13	28.08	7	28.08	13	28.08	9	28.08	2
28.12	3	28.12	10	28.12	13	28.12	7	28.12	15	28.12	10	28.12	3
28.16	7	28.16	10	28.16	8	28.16	11	28.16	11	28.16	12	28.16	7
28.2	6	28.2	9	28.2	11	28.2	6	28.2	17	28.2	11	28.2	2
28.24	5	28.24	7	28.24	9	28.24	12	28.24	12	28.24	11	28.24	8
28.28	9	28.28	12	28.28	13	28.28	11	28.28	10	28.28	10	28.28	6
28.32	7	28.32	11	28.32	14	28.32	7	28.32	20	28.32	6	28.32	7
28.36	12	28.36	10	28.36	14	28.36	5	28.36	28	28.36	11	28.36	11
28.4	12	28.4	13	28.4	11	28.4	10	28.4	10	28.4	10	28.4	6
28.44	13	28.44	5	28.44	19	28.44	16	28.44	27	28.44	3	28.44	14
28.48	26	28.48	15	28.48	16	28.48	16	28.48	24	28.48	13	28.48	13
28.52	45	28.52	10	28.52	14	28.52	10	28.52	32	28.52	22	28.52	19
28.56	34	28.56	21	28.56	18	28.56	27	28.56	20	28.56	23	28.56	18
28.6	34	28.6	22	28.6	17	28.6	27	28.6	22	28.6	16	28.6	16
28.64	12	28.64	17	28.64	13	28.64	30	28.64	14	28.64	21	28.64	10
28.68	11	28.68	19	28.68	17	28.68	18	28.68	29	28.68	14	28.68	27
28.72	15	28.72	23	28.72	18	28.72	14	28.72	19	28.72	13	28.72	18
28.76	13	28.76	30	28.76	20	28.76	9	28.76	26	28.76	12	28.76	21
28.8	17	28.8	32	28.8	31	28.8	14	28.8	24	28.8	4	28.8	27
28.84	43	28.84	56	28.84	24	28.84	13	28.84	24	28.84	17	28.84	35
28.88	70	28.88	34	28.88	17	28.88	13	28.88	28	28.88	18	28.88	75
28.92	105	28.92	35	28.92	28	28.92	23	28.92	15	28.92	24	28.92	46
28.96	54	28.96	19	28.96	27	28.96	13	28.96	17	28.96	19	28.96	52
29	37	29	14	29	22	29	21	29	19	29	24	29	21
29.04	16	29.04	17	29.04	16	29.04	9	29.04	19	29.04	21	29.04	15
29.08	16	29.08	18	29.08	14	29.08	16	29.08	14	29.08	7	29.08	7
29.12	18	29.12	14	29.12	12	29.12	8	29.12	16	29.12	9	29.12	15
29.16	10	29.16	14	29.16	6	29.16	17	29.16	16	29.16	22	29.16	15
29.2	12	29.2	16	29.2	14	29.2	11	29.2	21	29.2	12	29.2	8
29.24	8	29.24	11	29.24	12	29.24	10	29.24	16	29.24	10	29.24	13
29.28	12	29.28	13	29.28	14	29.28	9	29.28	18	29.28	10	29.28	19
29.32	15	29.32	25	29.32	11	29.32	16	29.32	17	29.32	13	29.32	11
29.36	13	29.36	27	29.36	20	29.36	13	29.36	13	29.36	12	29.36	20
29.4	15	29.4	20	29.4	18	29.4	7	29.4	12	29.4	26	29.4	27
29.44	7	29.44	16	29.44	20	29.44	10	29.44	12	29.44	16	29.44	16
29.48	10	29.48	8	29.48	11	29.48	9	29.48	13	29.48	18	29.48	11
29.52	6	29.52	16	29.52	12	29.52	8	29.52	14	29.52	10	29.52	5
29.56	12	29.56	11	29.56	10	29.56	12	29.56	17	29.56	19	29.56	11
29.6	6	29.6	4	29.6	12	29.6	9	29.6	14	29.6	13	29.6	6
29.64	15	29.64	7	29.64	9	29.64	7	29.64	10	29.64	10	29.64	1
29.68	10	29.68	19	29.68	11	29.68	6	29.68	15	29.68	6	29.68	6
29.72	8	29.72	13	29.72	12	29.72	4	29.72	9	29.72	12	29.72	8
29.76	9	29.76	10	29.76	11	29.76	7	29.76	18	29.76	11	29.76	9
29.8	6	29.8	16	29.8	15	29.8	6	29.8	14	29.8	12	29.8	14
29.84	12	29.84	13	29.84	9	29.84	10	29.84	17	29.84	16	29.84	57
29.88	16	29.88	20	29.88	15	29.88	12	29.88	13	29.88	11	29.88	63
29.92	16	29.92	10	29.92	11	29.92	11	29.92	11	29.92	6	29.92	30
29.96	11	29.96	10	29.96	15	29.96	16	29.96	19	29.96	20	29.96	34
30	7	30	12	30	8	30	11	30	20	30	13	30	15
30.04	7	30.04	9	30.04	13	30.04	11	30.04	17	30.04	16	30.04	10
30.08	12	30.08	5	30.08	17	30.08	7	30.08	18	30.08	4	30.08	8
30.12	11	30.12	10	30.12	11	30.12	9	30.12	24	30.12	16	30.12	9
30.16	8	30.16	8	30.16	6	30.16	13	30.16	14	30.16	12	30.16	5
30.2	8	30.2	12	30.2	10	30.2	11	30.2	12	30.2	10	30.2	9
30.24	6	30.24	11	30.24	3	30.24	8	30.24	15	30.24	12	30.24	10
30.28	9	30.28	6	30.28	9	30.28	12	30.28	18	30.28	8	30.28	10
30.32	10	30.32	3	30.32	10	30.32	6	30.32	17	30.32	8	30.32	19
30.36	12	30.36	8	30.36	12	30.36	8	30.36	20	30.36	10	30.36	14
30.4	11	30.4	7	30.4	10	30.4	9	30.4	22	30.4	10	30.4	9
30.44	6	30.44	6	30.44	9	30.44	7	30.44	17	30.44	11	30.44	8
30.48	12	30.48	10	30.48	14	30.48	11	30.48	13	30.48	8	30.48	8
30.52	4	30.52	8	30.52	11	30.52	11	30.52	21	30.52	12	30.52	13
30.56	12	30.56	9	30.56	10	30.56	4	30.56	14	30.56	17	30.56	2
30.6	4	30.6	10	30.6	8	30.6	10	30.6	10	30.6	11	30.6	10
30.64	8	30.64	12	30.64	9	30.64	9	30.64	11	30.64	11	30.64	9
30.68	6	30.68	8	30.68	6	30.68	14	30.68	18	30.68	6	30.68	5
30.72	5	30.72	7	30.72	8	30.72	8	30.72	21	30.72	15	30.72	1
30.76	6	30.76	11	30.76	10	30.76	15	30.76	12	30.76	8	30.76	6
30.8	6	30.8	8	30.8	16	30.8	7	30.8	14	30.8	14	30.8	9
30.84	6	30.84	8	30.84	5	30.84	10	30.84	8	30.84	10	30.84	11
30.88	4	30.88	13	30.88	13	30.88	6	30.88	6	30.88	10	30.88	4
30.92	4	30.92	12	30.92	10	30.92	8	30.92	12	30.92	15	30.92	8
30.96	6	30.96	8	30.96	6	30.96	5	30.96	14	30.96	5	30.96	2
31	3	31	8	31	9	31	6	31	12	31	7	31	4
31.04	6	31.04	6	31.04	10	31.04	8	31.04	15	31.04	7	31.04	11
31.08	8	31.08	10	31.08	10	31.08	11	31.08	13	31.08	10	31.08	6
31.12	9	31.12	19	31.12	13	31.12	6	31.12	11	31.12	11	31.12	8
31.16	10	31.16	17	31.16	17	31.16	7	31.16	7	31.16	9	31.16	3
31.2	14	31.2	22	31.2	18	31.2	6	31.2	14	31.2	7	31.2	12
31.24	9	31.24	35	31.24	38	31.24	8	31.24	18	31.24	15	31.24	17
31.28	4	31.28	24	31.28	14	31.28	7	31.28	13	31.28	25	31.28	13
31.32	9	31.32	13	31.32	13	31.32	9	31.32	14	31.32	12	31.32	4
31.36	14	31.36	10	31.36	6	31.36	6	31.36	12	31.36	16	31.36	3
31.4	3	31.4	7	31.4	16	31.4	6	31.4	10	31.4	16	31.4	8
31.44	9	31.44	4	31.44	9	31.44	10	31.44	11	31.44	13	31.44	5
31.48	8	31.48	7	31.48	14	31.48	6	31.48	20	31.48	7	31.48	3
31.52	4	31.52	8	31.52	9	31.52	7	31.52	10	31.52	7	31.52	11
31.56	0	31.56	10	31.56	8	31.56	9	31.56	16	31.56	8	31.56	7
31.6	7	31.6	7	31.6	13	31.6	9	31.6	16	31.6	3	31.6	7
31.64	5	31.64	7	31.64	9	31.64	7	31.64	8	31.64	8	31.64	9
31.68	5	31.68	9	31.68	9	31.68	7	31.68	15	31.68	9	31.68	8
31.72	6	31.72	8	31.72	12	31.72	12	31.72	19	31.72	5	31.72	12
31.76	6	31.76	10	31.76	7	31.76	7	31.76	18	31.76	8	31.76	8
31.8	3	31.8	6	31.8	10	31.8	8	31.8	5	31.8	7	31.8	2
31.84	6	31.84	9	31.84	19	31.84	10	31.84	12	31.84	9	31.84	5
31.88	7	31.88	6	31.88	14	31.88	10	31.88	8	31.88	5	31.88	9
31.92	9	31.92	11	31.92	10	31.92	9	31.92	19	31.92	6	31.92	7
31.96	10	31.96	10	31.96	10	31.96	6	31.96	9	31.96	10	31.96	6
32	7	32	12	32	11	32	8	32	18	32	9	32	10
32.04	9	32.04	7	32.04	13	32.04	8	32.04	11	32.04	13	32.04	9
32.08	13	32.08	11	32.08	7	32.08	6	32.08	11	32.08	6	32.08	5
32.12	14	32.12	8	32.12	10	32.12	7	32.12	9	32.12	9	32.12	6
32.16	9	32.16	9	32.16	6	32.16	15	32.16	13	32.16	13	32.16	8
32.2	13	32.2	12	32.2	13	32.2	7	32.2	15	32.2	8	32.2	9
32.24	11	32.24	7	32.24	8	32.24	16	32.24	23	32.24	11	32.24	8
32.28	12	32.28	8	32.28	11	32.28	10	32.28	17	32.28	14	32.28	6
32.32	6	32.32	8	32.32	8	32.32	9	32.32	17	32.32	6	32.32	7
32.36	10	32.36	13	32.36	12	32.36	4	32.36	16	32.36	13	32.36	5
32.4	6	32.4	8	32.4	9	32.4	10	32.4	11	32.4	8	32.4	9
32.44	10	32.44	18	32.44	15	32.44	8	32.44	10	32.44	10	32.44	6
32.48	7	32.48	14	32.48	7	32.48	8	32.48	12	32.48	18	32.48	8
32.52	9	32.52	16	32.52	9	32.52	8	32.52	12	32.52	8	32.52	6
32.56	13	32.56	14	32.56	11	32.56	6	32.56	13	32.56	14	32.56	9
32.6	13	32.6	17	32.6	20	32.6	9	32.6	15	32.6	8	32.6	11
32.64	10	32.64	13	32.64	14	32.64	9	32.64	11	32.64	12	32.64	5
32.68	16	32.68	19	32.68	11	32.68	12	32.68	17	32.68	12	32.68	10
32.72	11	32.72	10	32.72	6	32.72	14	32.72	20	32.72	15	32.72	7
32.76	11	32.76	9	32.76	17	32.76	12	32.76	17	32.76	9	32.76	13
32.8	15	32.8	26	32.8	18	32.8	11	32.8	13	32.8	10	32.8	7
32.84	9	32.84	17	32.84	17	32.84	10	32.84	10	32.84	11	32.84	9
32.88	12	32.88	9	32.88	12	32.88	10	32.88	23	32.88	14	32.88	9
32.92	12	32.92	19	32.92	16	32.92	9	32.92	15	32.92	13	32.92	15
32.96	7	32.96	13	32.96	14	32.96	7	32.96	21	32.96	20	32.96	9
33	10	33	17	33	19	33	7	33	11	33	9	33	16
33.04	17	33.04	6	33.04	10	33.04	8	33.04	9	33.04	13	33.04	12
33.08	9	33.08	11	33.08	8	33.08	10	33.08	13	33.08	6	33.08	12
33.12	10	33.12	13	33.12	9	33.12	11	33.12	12	33.12	13	33.12	12
33.16	5	33.16	15	33.16	19	33.16	6	33.16	15	33.16	9	33.16	15
33.2	12	33.2	14	33.2	9	33.2	15	33.2	17	33.2	8	33.2	13
33.24	13	33.24	15	33.24	8	33.24	8	33.24	8	33.24	15	33.24	8
33.28	23	33.28	11	33.28	8	33.28	10	33.28	19	33.28	20	33.28	10
33.32	17	33.32	20	33.32	14	33.32	13	33.32	19	33.32	14	33.32	16
33.36	19	33.36	15	33.36	9	33.36	9	33.36	23	33.36	15	33.36	18
33.4	14	33.4	14	33.4	10	33.4	8	33.4	14	33.4	12	33.4	12
33.44	17	33.44	17	33.44	10	33.44	14	33.44	21	33.44	18	33.44	12
33.48	17	33.48	18	33.48	19	33.48	12	33.48	16	33.48	9	33.48	17
33.52	15	33.52	15	33.52	18	33.52	15	33.52	12	33.52	18	33.52	11
33.56	14	33.56	13	33.56	13	33.56	15	33.56	17	33.56	13	33.56	19
33.6	17	33.6	18	33.6	12	33.6	12	33.6	16	33.6	15	33.6	13
33.64	12	33.64	15	33.64	15	33.64	15	33.64	14	33.64	19	33.64	16
33.68	10	33.68	7	33.68	20	33.68	16	33.68	15	33.68	13	33.68	15
33.72	25	33.72	19	33.72	11	33.72	8	33.72	12	33.72	18	33.72	19
33.76	16	33.76	22	33.76	8	33.76	10	33.76	20	33.76	15	33.76	19
33.8	51	33.8	20	33.8	25	33.8	16	33.8	19	33.8	16	33.8	20
33.84	33	33.84	30	33.84	20	33.84	13	33.84	12	33.84	12	33.84	29
33.88	36	33.88	17	33.88	12	33.88	4	33.88	17	33.88	15	33.88	26
33.92	31	33.92	23	33.92	18	33.92	12	33.92	7	33.92	14	33.92	23
33.96	25	33.96	36	33.96	17	33.96	13	33.96	13	33.96	22	33.96	20
34	16	34	27	34	24	34	11	34	16	34	14	34	17
34.04	29	34.04	27	34.04	22	34.04	16	34.04	14	34.04	12	34.04	14
34.08	20	34.08	26	34.08	15	34.08	12	34.08	16	34.08	18	34.08	21
34.12	17	34.12	25	34.12	19	34.12	12	34.12	24	34.12	17	34.12	23
34.16	22	34.16	30	34.16	19	34.16	17	34.16	16	34.16	19	34.16	24
34.2	31	34.2	43	34.2	15	34.2	10	34.2	19	34.2	13	34.2	23
34.24	45	34.24	63	34.24	26	34.24	27	34.24	26	34.24	24	34.24	36
34.28	34	34.28	56	34.28	30	34.28	13	34.28	32	34.28	25	34.28	39
34.32	47	34.32	53	34.32	44	34.32	14	34.32	23	34.32	21	34.32	45
34.36	26	34.36	50	34.36	33	34.36	16	34.36	22	34.36	32	34.36	47
34.4	26	34.4	45	34.4	36	34.4	27	34.4	29	34.4	25	34.4	28
34.44	38	34.44	56	34.44	29	34.44	20	34.44	22	34.44	26	34.44	37
34.48	47	34.48	54	34.48	27	34.48	22	34.48	16	34.48	23	34.48	53
34.52	58	34.52	38	34.52	38	34.52	17	34.52	19	34.52	35	34.52	22
34.56	43	34.56	44	34.56	37	34.56	20	34.56	33	34.56	28	34.56	58
34.6	28	34.6	27	34.6	26	34.6	13	34.6	29	34.6	44	34.6	51
34.64	36	34.64	21	34.64	29	34.64	28	34.64	36	34.64	36	34.64	44
34.68	32	34.68	30	34.68	19	34.68	20	34.68	22	34.68	27	34.68	38
34.72	30	34.72	23	34.72	16	34.72	17	34.72	24	34.72	22	34.72	43
34.76	46	34.76	14	34.76	13	34.76	17	34.76	25	34.76	15	34.76	22
34.8	23	34.8	26	34.8	18	34.8	14	34.8	18	34.8	30	34.8	28
34.84	32	34.84	18	34.84	18	34.84	11	34.84	16	34.84	49	34.84	33
34.88	17	34.88	27	34.88	23	34.88	19	34.88	12	34.88	48	34.88	19
34.92	24	34.92	16	34.92	14	34.92	13	34.92	24	34.92	50	34.92	29
34.96	21	34.96	35	34.96	15	34.96	20	34.96	20	34.96	42	34.96	22
35	26	35	28	35	12	35	13	35	12	35	15	35	26
35.04	21	35.04	24	35.04	19	35.04	13	35.04	17	35.04	25	35.04	25
35.08	24	35.08	24	35.08	15	35.08	14	35.08	9	35.08	20	35.08	25
35.12	27	35.12	28	35.12	25	35.12	20	35.12	13	35.12	20	35.12	18
35.16	27	35.16	34	35.16	18	35.16	11	35.16	11	35.16	16	35.16	31
35.2	86	35.2	40	35.2	18	35.2	12	35.2	14	35.2	14	35.2	47
35.24	89	35.24	41	35.24	21	35.24	13	35.24	11	35.24	20	35.24	70
35.28	47	35.28	36	35.28	42	35.28	17	35.28	20	35.28	17	35.28	28
35.32	70	35.32	49	35.32	26	35.32	10	35.32	17	35.32	20	35.32	41
35.36	20	35.36	20	35.36	29	35.36	12	35.36	16	35.36	19	35.36	36
35.4	19	35.4	21	35.4	27	35.4	14	35.4	10	35.4	15	35.4	24
35.44	22	35.44	27	35.44	15	35.44	12	35.44	20	35.44	24	35.44	15
35.48	14	35.48	22	35.48	14	35.48	14	35.48	15	35.48	6	35.48	22
35.52	27	35.52	23	35.52	18	35.52	22	35.52	16	35.52	18	35.52	15
35.56	22	35.56	11	35.56	14	35.56	13	35.56	21	35.56	14	35.56	14
35.6	15	35.6	18	35.6	16	35.6	16	35.6	14	35.6	16	35.6	20
35.64	14	35.64	12	35.64	14	35.64	9	35.64	14	35.64	20	35.64	19
35.68	13	35.68	22	35.68	18	35.68	8	35.68	19	35.68	15	35.68	22
35.72	19	35.72	17	35.72	9	35.72	13	35.72	14	35.72	18	35.72	16
35.76	14	35.76	24	35.76	11	35.76	16	35.76	17	35.76	14	35.76	22
35.8	20	35.8	19	35.8	7	35.8	13	35.8	11	35.8	11	35.8	12
35.84	18	35.84	14	35.84	15	35.84	8	35.84	15	35.84	13	35.84	13
35.88	23	35.88	16	35.88	14	35.88	14	35.88	6	35.88	8	35.88	23
35.92	13	35.92	12	35.92	13	35.92	12	35.92	13	35.92	23	35.92	17
35.96	11	35.96	12	35.96	12	35.96	11	35.96	19	35.96	16	35.96	10
36	14	36	13	36	19	36	17	36	14	36	13	36	8
36.04	15	36.04	14	36.04	18	36.04	16	36.04	17	36.04	18	36.04	14
36.08	9	36.08	17	36.08	11	36.08	10	36.08	10	36.08	12	36.08	8
36.12	6	36.12	11	36.12	13	36.12	10	36.12	17	36.12	7	36.12	12
36.16	11	36.16	10	36.16	10	36.16	11	36.16	17	36.16	11	36.16	5
36.2	14	36.2	8	36.2	11	36.2	12	36.2	12	36.2	17	36.2	12
36.24	18	36.24	11	36.24	12	36.24	13	36.24	13	36.24	13	36.24	14
36.28	13	36.28	14	36.28	15	36.28	7	36.28	10	36.28	13	36.28	10
36.32	16	36.32	11	36.32	9	36.32	14	36.32	9	36.32	12	36.32	9
36.36	11	36.36	15	36.36	8	36.36	13	36.36	15	36.36	15	36.36	11
36.4	18	36.4	7	36.4	12	36.4	11	36.4	7	36.4	9	36.4	15
36.44	9	36.44	17	36.44	8	36.44	5	36.44	13	36.44	9	36.44	8
36.48	8	36.48	13	36.48	6	36.48	8	36.48	12	36.48	6	36.48	12
36.52	14	36.52	11	36.52	10	36.52	6	36.52	13	36.52	10	36.52	8
36.56	20	36.56	13	36.56	16	36.56	11	36.56	17	36.56	9	36.56	18
36.6	6	36.6	8	36.6	19	36.6	5	36.6	6	36.6	9	36.6	10
36.64	7	36.64	8	36.64	13	36.64	14	36.64	12	36.64	9	36.64	11
36.68	3	36.68	13	36.68	13	36.68	6	36.68	11	36.68	10	36.68	4
36.72	7	36.72	15	36.72	13	36.72	4	36.72	11	36.72	8	36.72	16
36.76	12	36.76	8	36.76	15	36.76	8	36.76	13	36.76	6	36.76	14
36.8	11	36.8	11	36.8	10	36.8	7	36.8	13	36.8	4	36.8	7
36.84	13	36.84	19	36.84	7	36.84	3	36.84	13	36.84	7	36.84	11
36.88	10	36.88	11	36.88	13	36.88	10	36.88	17	36.88	12	36.88	6
36.92	11	36.92	9	36.92	13	36.92	9	36.92	13	36.92	8	36.92	12
36.96	14	36.96	14	36.96	18	36.96	6	36.96	21	36.96	11	36.96	12
37	7	37	16	37	16	37	14	37	11	37	7	37	3
37.04	12	37.04	12	37.04	6	37.04	7	37.04	9	37.04	5	37.04	14
37.08	6	37.08	11	37.08	10	37.08	10	37.08	11	37.08	6	37.08	10
37.12	14	37.12	8	37.12	10	37.12	5	37.12	12	37.12	7	37.12	13
37.16	9	37.16	20	37.16	15	37.16	3	37.16	12	37.16	8	37.16	14
37.2	8	37.2	8	37.2	11	37.2	5	37.2	10	37.2	9	37.2	7
37.24	11	37.24	8	37.24	11	37.24	6	37.24	11	37.24	9	37.24	7
37.28	14	37.28	11	37.28	13	37.28	8	37.28	12	37.28	13	37.28	9
37.32	9	37.32	13	37.32	6	37.32	11	37.32	12	37.32	9	37.32	12
37.36	15	37.36	12	37.36	11	37.36	8	37.36	10	37.36	12	37.36	15
37.4	8	37.4	15	37.4	14	37.4	5	37.4	4	37.4	12	37.4	7
37.44	18	37.44	7	37.44	11	37.44	8	37.44	10	37.44	14	37.44	8
37.48	54	37.48	14	37.48	11	37.48	9	37.48	16	37.48	5	37.48	11
37.52	17	37.52	11	37.52	18	37.52	9	37.52	11	37.52	12	37.52	15
37.56	24	37.56	15	37.56	5	37.56	9	37.56	15	37.56	9	37.56	8
37.6	12	37.6	13	37.6	11	37.6	8	37.6	4	37.6	10	37.6	14
37.64	18	37.64	11	37.64	7	37.64	10	37.64	10	37.64	6	37.64	10
37.68	8	37.68	8	37.68	10	37.68	11	37.68	9	37.68	7	37.68	14
37.72	10	37.72	9	37.72	7	37.72	7	37.72	11	37.72	8	37.72	14
37.76	8	37.76	13	37.76	10	37.76	7	37.76	18	37.76	11	37.76	10
37.8	12	37.8	13	37.8	6	37.8	6	37.8	9	37.8	11	37.8	8
37.84	14	37.84	14	37.84	12	37.84	8	37.84	12	37.84	3	37.84	10
37.88	10	37.88	16	37.88	9	37.88	10	37.88	8	37.88	13	37.88	11
37.92	9	37.92	7	37.92	10	37.92	5	37.92	12	37.92	12	37.92	14
37.96	10	37.96	12	37.96	10	37.96	8	37.96	10	37.96	16	37.96	12
38	15	38	7	38	8	38	7	38	18	38	6	38	11
38.04	10	38.04	6	38.04	11	38.04	2	38.04	10	38.04	8	38.04	10
38.08	7	38.08	9	38.08	8	38.08	11	38.08	14	38.08	17	38.08	11
38.12	14	38.12	10	38.12	12	38.12	10	38.12	11	38.12	8	38.12	8
38.16	12	38.16	9	38.16	10	38.16	11	38.16	9	38.16	10	38.16	10
38.2	17	38.2	20	38.2	13	38.2	10	38.2	10	38.2	12	38.2	10
38.24	11	38.24	19	38.24	9	38.24	10	38.24	13	38.24	13	38.24	9
38.28	19	38.28	12	38.28	10	38.28	9	38.28	7	38.28	15	38.28	19
38.32	7	38.32	16	38.32	23	38.32	5	38.32	12	38.32	13	38.32	13
38.36	10	38.36	20	38.36	13	38.36	13	38.36	10	38.36	9	38.36	13
38.4	10	38.4	17	38.4	15	38.4	14	38.4	6	38.4	12	38.4	7
38.44	10	38.44	15	38.44	12	38.44	7	38.44	12	38.44	13	38.44	7
38.48	4	38.48	16	38.48	9	38.48	3	38.48	10	38.48	16	38.48	9
38.52	12	38.52	11	38.52	8	38.52	4	38.52	13	38.52	11	38.52	6
38.56	12	38.56	9	38.56	10	38.56	10	38.56	8	38.56	10	38.56	9
38.6	14	38.6	16	38.6	10	38.6	13	38.6	11	38.6	8	38.6	9
38.64	18	38.64	18	38.64	15	38.64	4	38.64	12	38.64	11	38.64	12
38.68	5	38.68	12	38.68	16	38.68	6	38.68	13	38.68	17	38.68	6
38.72	14	38.72	13	38.72	10	38.72	4	38.72	16	38.72	15	38.72	13
38.76	6	38.76	10	38.76	14	38.76	11	38.76	4	38.76	9	38.76	9
38.8	8	38.8	7	38.8	8	38.8	6	38.8	14	38.8	10	38.8	9
38.84	8	38.84	8	38.84	9	38.84	10	38.84	12	38.84	10	38.84	7
38.88	9	38.88	8	38.88	5	38.88	5	38.88	6	38.88	5	38.88	7
38.92	2	38.92	11	38.92	9	38.92	6	38.92	15	38.92	8	38.92	5
38.96	9	38.96	7	38.96	10	38.96	7	38.96	5	38.96	7	38.96	6
39	10	39	10	39	5	39	6	39	10	39	14	39	7
39.04	10	39.04	6	39.04	7	39.04	4	39.04	6	39.04	7	39.04	9
39.08	10	39.08	13	39.08	9	39.08	7	39.08	10	39.08	6	39.08	7
39.12	12	39.12	9	39.12	9	39.12	4	39.12	12	39.12	6	39.12	7
39.16	9	39.16	21	39.16	2	39.16	4	39.16	4	39.16	6	39.16	5
39.2	3	39.2	6	39.2	7	39.2	5	39.2	9	39.2	8	39.2	3
39.24	9	39.24	14	39.24	10	39.24	19	39.24	17	39.24	7	39.24	7
39.28	9	39.28	11	39.28	15	39.28	4	39.28	8	39.28	12	39.28	4
39.32	8	39.32	8	39.32	10	39.32	6	39.32	4	39.32	2	39.32	7
39.36	8	39.36	10	39.36	5	39.36	9	39.36	10	39.36	7	39.36	14
39.4	11	39.4	14	39.4	10	39.4	6	39.4	14	39.4	7	39.4	6
39.44	9	39.44	13	39.44	7	39.44	5	39.44	14	39.44	7	39.44	7
39.48	9	39.48	7	39.48	3	39.48	7	39.48	10	39.48	6	39.48	6
39.52	3	39.52	14	39.52	7	39.52	7	39.52	11	39.52	12	39.52	6
39.56	10	39.56	10	39.56	9	39.56	4	39.56	7	39.56	10	39.56	7
39.6	15	39.6	12	39.6	13	39.6	11	39.6	12	39.6	10	39.6	9
39.64	7	39.64	16	39.64	11	39.64	13	39.64	9	39.64	9	39.64	11
39.68	11	39.68	15	39.68	8	39.68	4	39.68	7	39.68	12	39.68	8
39.72	5	39.72	12	39.72	7	39.72	10	39.72	10	39.72	8	39.72	6
39.76	5	39.76	10	39.76	7	39.76	5	39.76	18	39.76	9	39.76	8
39.8	6	39.8	14	39.8	6	39.8	7	39.8	8	39.8	8	39.8	8
39.84	10	39.84	5	39.84	11	39.84	7	39.84	9	39.84	9	39.84	1
39.88	7	39.88	4	39.88	9	39.88	12	39.88	5	39.88	4	39.88	7
39.92	6	39.92	12	39.92	8	39.92	9	39.92	10	39.92	6	39.92	9
39.96	9	39.96	11	39.96	13	39.96	7	39.96	14	39.96	9	39.96	6
40	5	40	8	40	6	40	9	40	10	40	9	40	4
40.04	14	40.04	13	40.04	13	40.04	3	40.04	16	40.04	9	40.04	6
40.08	11	40.08	10	40.08	12	40.08	6	40.08	11	40.08	7	40.08	9
40.12	11	40.12	8	40.12	6	40.12	6	40.12	11	40.12	10	40.12	10
40.16	9	40.16	8	40.16	10	40.16	5	40.16	13	40.16	15	40.16	11
40.2	7	40.2	12	40.2	5	40.2	5	40.2	8	40.2	6	40.2	7
40.24	14	40.24	12	40.24	15	40.24	5	40.24	12	40.24	12	40.24	9
40.28	12	40.28	23	40.28	14	40.28	2	40.28	8	40.28	9	40.28	18
40.32	12	40.32	20	40.32	8	40.32	4	40.32	10	40.32	6	40.32	19
40.36	8	40.36	13	40.36	13	40.36	1	40.36	10	40.36	11	40.36	20
40.4	16	40.4	20	40.4	10	40.4	5	40.4	11	40.4	10	40.4	20
40.44	8	40.44	18	40.44	7	40.44	13	40.44	11	40.44	6	40.44	17
40.48	11	40.48	16	40.48	19	40.48	7	40.48	8	40.48	10	40.48	10
40.52	16	40.52	12	40.52	12	40.52	7	40.52	11	40.52	12	40.52	19
40.56	12	40.56	12	40.56	16	40.56	8	40.56	12	40.56	23	40.56	15
40.6	13	40.6	12	40.6	12	40.6	13	40.6	14	40.6	13	40.6	12
40.64	19	40.64	13	40.64	7	40.64	14	40.64	13	40.64	9	40.64	10
40.68	20	40.68	14	40.68	10	40.68	11	40.68	6	40.68	12	40.68	13
40.72	9	40.72	12	40.72	9	40.72	14	40.72	11	40.72	12	40.72	17
40.76	13	40.76	15	40.76	10	40.76	8	40.76	7	40.76	17	40.76	12
40.8	17	40.8	9	40.8	10	40.8	5	40.8	10	40.8	11	40.8	12
40.84	13	40.84	13	40.84	9	40.84	12	40.84	19	40.84	12	40.84	10
40.88	13	40.88	15	40.88	12	40.88	13	40.88	11	40.88	7	40.88	10
40.92	12	40.92	19	40.92	14	40.92	6	40.92	11	40.92	8	40.92	14
40.96	15	40.96	12	40.96	11	40.96	16	40.96	14	40.96	7	40.96	17
41	16	41	19	41	13	41	10	41	10	41	10	41	15
41.04	12	41.04	16	41.04	2	41.04	2	41.04	20	41.04	12	41.04	9
41.08	11	41.08	10	41.08	10	41.08	5	41.08	15	41.08	10	41.08	11
41.12	8	41.12	11	41.12	19	41.12	6	41.12	13	41.12	12	41.12	9
41.16	7	41.16	13	41.16	10	41.16	7	41.16	9	41.16	5	41.16	8
41.2	9	41.2	10	41.2	13	41.2	8	41.2	13	41.2	9	41.2	7
41.24	12	41.24	12	41.24	10	41.24	16	41.24	7	41.24	5	41.24	4
41.28	7	41.28	10	41.28	9	41.28	8	41.28	15	41.28	5	41.28	4
41.32	13	41.32	7	41.32	5	41.32	7	41.32	12	41.32	12	41.32	9
41.36	12	41.36	13	41.36	12	41.36	4	41.36	6	41.36	5	41.36	10
41.4	11	41.4	18	41.4	16	41.4	8	41.4	10	41.4	11	41.4	14
41.44	12	41.44	12	41.44	12	41.44	5	41.44	19	41.44	15	41.44	25
41.48	14	41.48	12	41.48	11	41.48	6	41.48	12	41.48	4	41.48	13
41.52	14	41.52	11	41.52	5	41.52	6	41.52	9	41.52	5	41.52	10
41.56	14	41.56	14	41.56	8	41.56	11	41.56	12	41.56	12	41.56	17
41.6	11	41.6	12	41.6	14	41.6	6	41.6	12	41.6	9	41.6	14
41.64	10	41.64	7	41.64	8	41.64	10	41.64	9	41.64	10	41.64	7
41.68	8	41.68	10	41.68	9	41.68	7	41.68	16	41.68	13	41.68	7
41.72	19	41.72	13	41.72	8	41.72	7	41.72	17	41.72	13	41.72	7
41.76	8	41.76	14	41.76	7	41.76	5	41.76	12	41.76	12	41.76	17
41.8	13	41.8	6	41.8	7	41.8	15	41.8	15	41.8	14	41.8	15
41.84	14	41.84	7	41.84	7	41.84	13	41.84	11	41.84	13	41.84	11
41.88	9	41.88	5	41.88	7	41.88	13	41.88	15	41.88	12	41.88	17
41.92	8	41.92	11	41.92	8	41.92	6	41.92	8	41.92	8	41.92	7
41.96	4	41.96	6	41.96	8	41.96	13	41.96	7	41.96	14	41.96	10
42	5	42	8	42	9	42	5	42	9	42	13	42	6
42.04	7	42.04	12	42.04	14	42.04	8	42.04	14	42.04	10	42.04	10
42.08	6	42.08	6	42.08	5	42.08	5	42.08	15	42.08	12	42.08	9
42.12	9	42.12	13	42.12	8	42.12	7	42.12	17	42.12	8	42.12	8
42.16	11	42.16	10	42.16	7	42.16	4	42.16	14	42.16	8	42.16	5
42.2	9	42.2	6	42.2	6	42.2	7	42.2	17	42.2	11	42.2	3
42.24	9	42.24	7	42.24	10	42.24	7	42.24	9	42.24	8	42.24	11
42.28	6	42.28	4	42.28	8	42.28	11	42.28	9	42.28	15	42.28	4
42.32	6	42.32	8	42.32	7	42.32	4	42.32	11	42.32	7	42.32	10
42.36	10	42.36	7	42.36	7	42.36	5	42.36	13	42.36	11	42.36	10
42.4	11	42.4	10	42.4	8	42.4	10	42.4	15	42.4	7	42.4	4
42.44	4	42.44	8	42.44	12	42.44	7	42.44	13	42.44	5	42.44	6
42.48	3	42.48	7	42.48	10	42.48	7	42.48	14	42.48	7	42.48	8
42.52	4	42.52	9	42.52	8	42.52	7	42.52	12	42.52	7	42.52	6
42.56	11	42.56	9	42.56	6	42.56	5	42.56	14	42.56	7	42.56	7
42.6	6	42.6	11	42.6	9	42.6	10	42.6	11	42.6	8	42.6	7
42.64	10	42.64	6	42.64	10	42.64	3	42.64	5	42.64	11	42.64	4
42.68	9	42.68	7	42.68	10	42.68	5	42.68	7	42.68	13	42.68	6
42.72	8	42.72	6	42.72	5	42.72	6	42.72	10	42.72	6	42.72	8
42.76	5	42.76	4	42.76	8	42.76	4	42.76	12	42.76	12	42.76	9
42.8	11	42.8	12	42.8	12	42.8	7	42.8	14	42.8	9	42.8	6
42.84	9	42.84	11	42.84	15	42.84	7	42.84	11	42.84	10	42.84	12
42.88	11	42.88	8	42.88	15	42.88	4	42.88	10	42.88	14	42.88	6
42.92	14	42.92	12	42.92	5	42.92	7	42.92	10	42.92	6	42.92	13
42.96	8	42.96	11	42.96	6	42.96	9	42.96	6	42.96	8	42.96	14
43	5	43	14	43	19	43	6	43	4	43	9	43	6
43.04	6	43.04	14	43.04	8	43.04	2	43.04	11	43.04	22	43.04	13
43.08	9	43.08	5	43.08	4	43.08	3	43.08	10	43.08	10	43.08	11
43.12	12	43.12	8	43.12	12	43.12	7	43.12	12	43.12	8	43.12	6
43.16	12	43.16	11	43.16	7	43.16	9	43.16	9	43.16	18	43.16	8
43.2	10	43.2	15	43.2	10	43.2	8	43.2	6	43.2	6	43.2	7
43.24	10	43.24	12	43.24	8	43.24	4	43.24	14	43.24	7	43.24	7
43.28	12	43.28	9	43.28	8	43.28	10	43.28	21	43.28	4	43.28	6
43.32	9	43.32	11	43.32	9	43.32	13	43.32	13	43.32	14	43.32	15
43.36	5	43.36	6	43.36	12	43.36	6	43.36	14	43.36	11	43.36	11
43.4	11	43.4	16	43.4	7	43.4	5	43.4	18	43.4	4	43.4	12
43.44	6	43.44	13	43.44	10	43.44	9	43.44	4	43.44	6	43.44	13
43.48	7	43.48	9	43.48	10	43.48	3	43.48	12	43.48	16	43.48	8
43.52	8	43.52	1	43.52	7	43.52	10	43.52	13	43.52	13	43.52	11
43.56	10	43.56	8	43.56	5	43.56	7	43.56	11	43.56	10	43.56	6
43.6	6	43.6	7	43.6	11	43.6	5	43.6	9	43.6	6	43.6	9
43.64	7	43.64	15	43.64	6	43.64	10	43.64	14	43.64	8	43.64	7
43.68	7	43.68	12	43.68	6	43.68	5	43.68	12	43.68	6	43.68	11
43.72	11	43.72	4	43.72	7	43.72	6	43.72	9	43.72	7	43.72	9
43.76	5	43.76	13	43.76	5	43.76	5	43.76	9	43.76	10	43.76	9
43.8	8	43.8	11	43.8	12	43.8	3	43.8	9	43.8	5	43.8	7
43.84	4	43.84	5	43.84	7	43.84	7	43.84	10	43.84	4	43.84	4
43.88	3	43.88	11	43.88	6	43.88	4	43.88	6	43.88	6	43.88	9
43.92	11	43.92	3	43.92	8	43.92	8	43.92	8	43.92	10	43.92	6
43.96	7	43.96	7	43.96	6	43.96	4	43.96	9	43.96	10	43.96	4
44	5	44	11	44	5	44	6	44	6	44	8	44	2
44.04	5	44.04	8	44.04	8	44.04	10	44.04	11	44.04	4	44.04	4
44.08	8	44.08	4	44.08	12	44.08	4	44.08	7	44.08	8	44.08	4
44.12	6	44.12	5	44.12	4	44.12	7	44.12	5	44.12	10	44.12	8
44.16	0	44.16	8	44.16	7	44.16	6	44.16	6	44.16	6	44.16	8
44.2	11	44.2	4	44.2	7	44.2	8	44.2	4	44.2	6	44.2	6
44.24	11	44.24	8	44.24	8	44.24	9	44.24	5	44.24	6	44.24	8
44.28	4	44.28	8	44.28	3	44.28	8	44.28	9	44.28	9	44.28	4
44.32	11	44.32	7	44.32	9	44.32	6	44.32	7	44.32	9	44.32	5
44.36	11	44.36	11	44.36	5	44.36	6	44.36	8	44.36	2	44.36	5
44.4	4	44.4	18	44.4	5	44.4	3	44.4	6	44.4	6	44.4	4
44.44	21	44.44	6	44.44	7	44.44	7	44.44	8	44.44	8	44.44	10
44.48	15	44.48	8	44.48	7	44.48	10	44.48	10	44.48	7	44.48	14
44.52	12	44.52	6	44.52	5	44.52	3	44.52	15	44.52	6	44.52	10
44.56	12	44.56	9	44.56	13	44.56	7	44.56	10	44.56	8	44.56	6
44.6	8	44.6	8	44.6	7	44.6	4	44.6	9	44.6	2	44.6	11
44.64	4	44.64	6	44.64	4	44.64	6	44.64	10	44.64	12	44.64	6
44.68	5	44.68	10	44.68	7	44.68	2	44.68	4	44.68	3	44.68	1
44.72	9	44.72	5	44.72	8	44.72	6	44.72	11	44.72	3	44.72	8
44.76	8	44.76	7	44.76	9	44.76	4	44.76	5	44.76	11	44.76	2
44.8	8	44.8	6	44.8	4	44.8	11	44.8	7	44.8	9	44.8	3
44.84	3	44.84	11	44.84	9	44.84	1	44.84	6	44.84	4	44.84	9
44.88	9	44.88	10	44.88	7	44.88	10	44.88	6	44.88	9	44.88	14
44.92	9	44.92	7	44.92	6	44.92	4	44.92	10	44.92	11	44.92	7
44.96	8	44.96	11	44.96	6	44.96	3	44.96	12	44.96	6	44.96	8
45	11	45	3	45	4	45	6	45	8	45	9	45	10
45.04	9	45.04	7	45.04	8	45.04	9	45.04	7	45.04	10	45.04	7
45.08	6	45.08	8	45.08	10	45.08	5	45.08	11	45.08	9	45.08	7
45.12	5	45.12	4	45.12	7	45.12	5	45.12	12	45.12	6	45.12	9
45.16	6	45.16	11	45.16	6	45.16	5	45.16	9	45.16	8	45.16	7
45.2	0	45.2	7	45.2	7	45.2	4	45.2	6	45.2	7	45.2	7
45.24	4	45.24	7	45.24	12	45.24	5	45.24	12	45.24	10	45.24	3
45.28	6	45.28	9	45.28	7	45.28	6	45.28	6	45.28	5	45.28	3
45.32	6	45.32	5	45.32	7	45.32	5	45.32	12	45.32	8	45.32	3
45.36	4	45.36	4	45.36	7	45.36	3	45.36	6	45.36	8	45.36	6
45.4	6	45.4	7	45.4	6	45.4	8	45.4	5	45.4	6	45.4	5
45.44	12	45.44	10	45.44	11	45.44	5	45.44	6	45.44	6	45.44	3
45.48	4	45.48	9	45.48	3	45.48	10	45.48	9	45.48	6	45.48	9
45.52	10	45.52	6	45.52	8	45.52	6	45.52	11	45.52	6	45.52	4
45.56	8	45.56	9	45.56	6	45.56	7	45.56	10	45.56	8	45.56	4
45.6	5	45.6	5	45.6	5	45.6	10	45.6	11	45.6	6	45.6	5
45.64	7	45.64	6	45.64	8	45.64	8	45.64	5	45.64	7	45.64	6
45.68	12	45.68	9	45.68	10	45.68	1	45.68	5	45.68	4	45.68	6
45.72	6	45.72	6	45.72	6	45.72	5	45.72	7	45.72	4	45.72	6
45.76	9	45.76	9	45.76	8	45.76	5	45.76	14	45.76	11	45.76	1
45.8	3	45.8	7	45.8	5	45.8	7	45.8	9	45.8	7	45.8	8
45.84	1	45.84	10	45.84	3	45.84	2	45.84	7	45.84	6	45.84	9
45.88	8	45.88	9	45.88	4	45.88	3	45.88	5	45.88	9	45.88	6
45.92	11	45.92	4	45.92	6	45.92	7	45.92	13	45.92	10	45.92	3
45.96	9	45.96	10	45.96	8	45.96	11	45.96	11	45.96	8	45.96	10
46	11	46	8	46	3	46	3	46	10	46	3	46	8
46.04	2	46.04	6	46.04	7	46.04	14	46.04	7	46.04	7	46.04	12
46.08	7	46.08	6	46.08	8	46.08	8	46.08	7	46.08	5	46.08	4
46.12	7	46.12	10	46.12	6	46.12	9	46.12	7	46.12	5	46.12	2
46.16	9	46.16	6	46.16	13	46.16	6	46.16	7	46.16	5	46.16	6
46.2	6	46.2	9	46.2	6	46.2	3	46.2	4	46.2	10	46.2	7
46.24	4	46.24	5	46.24	9	46.24	7	46.24	8	46.24	7	46.24	9
46.28	8	46.28	7	46.28	6	46.28	5	46.28	7	46.28	9	46.28	4
46.32	1	46.32	4	46.32	6	46.32	7	46.32	4	46.32	10	46.32	6
46.36	4	46.36	4	46.36	9	46.36	7	46.36	7	46.36	6	46.36	4
46.4	4	46.4	4	46.4	4	46.4	7	46.4	13	46.4	9	46.4	6
46.44	6	46.44	5	46.44	4	46.44	7	46.44	11	46.44	7	46.44	4
46.48	5	46.48	12	46.48	11	46.48	3	46.48	8	46.48	8	46.48	1
46.52	5	46.52	10	46.52	12	46.52	5	46.52	11	46.52	5	46.52	4
46.56	7	46.56	4	46.56	8	46.56	4	46.56	5	46.56	6	46.56	5
46.6	7	46.6	7	46.6	11	46.6	6	46.6	12	46.6	9	46.6	7
46.64	6	46.64	8	46.64	4	46.64	6	46.64	10	46.64	8	46.64	10
46.68	3	46.68	8	46.68	12	46.68	3	46.68	15	46.68	7	46.68	14
46.72	5	46.72	7	46.72	12	46.72	4	46.72	8	46.72	6	46.72	11
46.76	9	46.76	8	46.76	6	46.76	4	46.76	4	46.76	9	46.76	2
46.8	4	46.8	10	46.8	6	46.8	4	46.8	14	46.8	6	46.8	6
46.84	12	46.84	9	46.84	4	46.84	7	46.84	7	46.84	5	46.84	6
46.88	13	46.88	2	46.88	8	46.88	2	46.88	9	46.88	4	46.88	5
46.92	8	46.92	7	46.92	5	46.92	7	46.92	19	46.92	8	46.92	6
46.96	9	46.96	5	46.96	9	46.96	8	46.96	9	46.96	8	46.96	7
47	2	47	12	47	8	47	7	47	5	47	3	47	12
47.04	4	47.04	6	47.04	6	47.04	6	47.04	9	47.04	9	47.04	5
47.08	7	47.08	11	47.08	7	47.08	9	47.08	14	47.08	3	47.08	6
47.12	2	47.12	9	47.12	8	47.12	6	47.12	6	47.12	8	47.12	7
47.16	2	47.16	10	47.16	9	47.16	6	47.16	8	47.16	7	47.16	4
47.2	2	47.2	1	47.2	14	47.2	8	47.2	7	47.2	9	47.2	4
47.24	4	47.24	5	47.24	11	47.24	4	47.24	10	47.24	9	47.24	10
47.28	6	47.28	12	47.28	7	47.28	4	47.28	4	47.28	9	47.28	4
47.32	4	47.32	3	47.32	10	47.32	8	47.32	14	47.32	5	47.32	5
47.36	3	47.36	6	47.36	4	47.36	8	47.36	13	47.36	5	47.36	4
47.4	8	47.4	10	47.4	5	47.4	5	47.4	7	47.4	4	47.4	5
47.44	3	47.44	9	47.44	4	47.44	8	47.44	9	47.44	4	47.44	6
47.48	6	47.48	7	47.48	4	47.48	3	47.48	5	47.48	7	47.48	9
47.52	5	47.52	6	47.52	8	47.52	7	47.52	8	47.52	11	47.52	4
47.56	7	47.56	4	47.56	8	47.56	1	47.56	6	47.56	4	47.56	5
47.6	7	47.6	6	47.6	7	47.6	6	47.6	4	47.6	8	47.6	4
47.64	3	47.64	7	47.64	5	47.64	1	47.64	11	47.64	7	47.64	5
47.68	4	47.68	2	47.68	7	47.68	7	47.68	9	47.68	12	47.68	7
47.72	6	47.72	7	47.72	9	47.72	2	47.72	7	47.72	6	47.72	5
47.76	7	47.76	7	47.76	5	47.76	4	47.76	7	47.76	4	47.76	8
47.8	2	47.8	2	47.8	9	47.8	6	47.8	14	47.8	6	47.8	8
47.84	6	47.84	7	47.84	4	47.84	3	47.84	7	47.84	9	47.84	5
47.88	3	47.88	9	47.88	5	47.88	5	47.88	12	47.88	7	47.88	4
47.92	8	47.92	7	47.92	8	47.92	5	47.92	14	47.92	7	47.92	6
47.96	9	47.96	10	47.96	8	47.96	6	47.96	4	47.96	5	47.96	4
48	7	48	10	48	8	48	6	48	6	48	7	48	6
48.04	11	48.04	10	48.04	6	48.04	7	48.04	13	48.04	6	48.04	6
48.08	9	48.08	12	48.08	9	48.08	3	48.08	11	48.08	10	48.08	8
48.12	7	48.12	5	48.12	4	48.12	7	48.12	7	48.12	8	48.12	9
48.16	6	48.16	6	48.16	7	48.16	5	48.16	5	48.16	5	48.16	6
48.2	5	48.2	3	48.2	8	48.2	4	48.2	8	48.2	11	48.2	3
48.24	9	48.24	6	48.24	13	48.24	7	48.24	10	48.24	6	48.24	8
48.28	4	48.28	7	48.28	2	48.28	4	48.28	8	48.28	8	48.28	7
48.32	3	48.32	9	48.32	7	48.32	6	48.32	9	48.32	8	48.32	7
48.36	4	48.36	7	48.36	5	48.36	6	48.36	5	48.36	7	48.36	6
48.4	8	48.4	6	48.4	8	48.4	4	48.4	10	48.4	4	48.4	8
48.44	8	48.44	4	48.44	7	48.44	6	48.44	6	48.44	4	48.44	5
48.48	7	48.48	9	48.48	4	48.48	6	48.48	8	48.48	6	48.48	6
48.52	13	48.52	8	48.52	3	48.52	0	48.52	7	48.52	7	48.52	1
48.56	6	48.56	11	48.56	8	48.56	4	48.56	7	48.56	2	48.56	7
48.6	5	48.6	3	48.6	5	48.6	6	48.6	13	48.6	9	48.6	12
48.64	8	48.64	4	48.64	5	48.64	6	48.64	7	48.64	4	48.64	6
48.68	3	48.68	8	48.68	4	48.68	4	48.68	7	48.68	9	48.68	8
48.72	13	48.72	4	48.72	9	48.72	10	48.72	16	48.72	11	48.72	3
48.76	11	48.76	5	48.76	7	48.76	6	48.76	13	48.76	12	48.76	8
48.8	3	48.8	4	48.8	4	48.8	5	48.8	7	48.8	6	48.8	8
48.84	10	48.84	5	48.84	7	48.84	4	48.84	11	48.84	8	48.84	5
48.88	11	48.88	8	48.88	9	48.88	7	48.88	6	48.88	5	48.88	4
48.92	6	48.92	11	48.92	5	48.92	4	48.92	12	48.92	6	48.92	6
48.96	9	48.96	10	48.96	5	48.96	8	48.96	12	48.96	6	48.96	10
49	10	49	7	49	3	49	5	49	9	49	7	49	5
49.04	4	49.04	8	49.04	5	49.04	4	49.04	4	49.04	5	49.04	8
49.08	6	49.08	5	49.08	6	49.08	5	49.08	11	49.08	7	49.08	13
49.12	4	49.12	5	49.12	10	49.12	5	49.12	18	49.12	4	49.12	10
49.16	3	49.16	12	49.16	9	49.16	7	49.16	12	49.16	5	49.16	11
49.2	6	49.2	6	49.2	10	49.2	5	49.2	5	49.2	9	49.2	8
49.24	4	49.24	6	49.24	2	49.24	4	49.24	15	49.24	4	49.24	3
49.28	5	49.28	7	49.28	7	49.28	4	49.28	16	49.28	14	49.28	8
49.32	5	49.32	3	49.32	4	49.32	9	49.32	9	49.32	8	49.32	12
49.36	9	49.36	7	49.36	5	49.36	2	49.36	8	49.36	7	49.36	10
49.4	5	49.4	8	49.4	4	49.4	4	49.4	10	49.4	5	49.4	5
49.44	7	49.44	5	49.44	6	49.44	3	49.44	12	49.44	8	49.44	9
49.48	8	49.48	10	49.48	5	49.48	5	49.48	9	49.48	5	49.48	8
49.52	5	49.52	6	49.52	4	49.52	10	49.52	6	49.52	6	49.52	5
49.56	11	49.56	4	49.56	4	49.56	7	49.56	5	49.56	8	49.56	8
49.6	8	49.6	6	49.6	4	49.6	5	49.6	7	49.6	4	49.6	4
49.64	4	49.64	7	49.64	4	49.64	3	49.64	5	49.64	3	49.64	6
49.68	9	49.68	7	49.68	10	49.68	8	49.68	7	49.68	5	49.68	7
49.72	6	49.72	10	49.72	6	49.72	10	49.72	6	49.72	8	49.72	3
49.76	7	49.76	8	49.76	6	49.76	7	49.76	10	49.76	8	49.76	7
49.8	7	49.8	8	49.8	11	49.8	4	49.8	7	49.8	11	49.8	3
49.84	11	49.84	8	49.84	8	49.84	9	49.84	11	49.84	4	49.84	5
49.88	9	49.88	6	49.88	6	49.88	11	49.88	7	49.88	7	49.88	9
49.92	5	49.92	6	49.92	4	49.92	9	49.92	15	49.92	13	49.92	6
49.96	3	49.96	5	49.96	11	49.96	10	49.96	13	49.96	9	49.96	5
50	5	50	6	50	8	50	7	50	9	50	8	50	8
50.04	3	50.04	11	50.04	8	50.04	5	50.04	8	50.04	17	50.04	2
50.08	5	50.08	8	50.08	4	50.08	1	50.08	9	50.08	16	50.08	5
50.12	11	50.12	8	50.12	5	50.12	4	50.12	10	50.12	4	50.12	8
50.16	9	50.16	10	50.16	6	50.16	6	50.16	7	50.16	7	50.16	4
50.2	8	50.2	6	50.2	5	50.2	2	50.2	5	50.2	12	50.2	10
50.24	7	50.24	13	50.24	7	50.24	2	50.24	10	50.24	19	50.24	9
50.28	11	50.28	18	50.28	10	50.28	3	50.28	16	50.28	13	50.28	11
50.32	16	50.32	19	50.32	12	50.32	13	50.32	7	50.32	9	50.32	18
50.36	10	50.36	14	50.36	26	50.36	6	50.36	11	50.36	9	50.36	21
50.4	17	50.4	15	50.4	17	50.4	5	50.4	10	50.4	10	50.4	21
50.44	8	50.44	10	50.44	8	50.44	8	50.44	7	50.44	18	50.44	14
50.48	12	50.48	8	50.48	17	50.48	11	50.48	11	50.48	10	50.48	9
50.52	5	50.52	17	50.52	10	50.52	5	50.52	7	50.52	9	50.52	13
50.56	15	50.56	16	50.56	17	50.56	8	50.56	7	50.56	10	50.56	5
50.6	15	50.6	9	50.6	13	50.6	8	50.6	15	50.6	6	50.6	11
50.64	11	50.64	13	50.64	8	50.64	7	50.64	7	50.64	10	50.64	6
50.68	8	50.68	17	50.68	9	50.68	7	50.68	15	50.68	10	50.68	7
50.72	7	50.72	10	50.72	6	50.72	9	50.72	13	50.72	5	50.72	9
50.76	6	50.76	6	50.76	8	50.76	6	50.76	16	50.76	7	50.76	8
50.8	8	50.8	7	50.8	7	50.8	10	50.8	9	50.8	9	50.8	3
50.84	7	50.84	14	50.84	8	50.84	8	50.84	9	50.84	10	50.84	3
50.88	6	50.88	8	50.88	6	50.88	6	50.88	7	50.88	9	50.88	6
50.92	8	50.92	10	50.92	9	50.92	7	50.92	8	50.92	6	50.92	6
50.96	4	50.96	7	50.96	12	50.96	3	50.96	14	50.96	7	50.96	7
51	5	51	10	51	7	51	8	51	8	51	5	51	7
51.04	12	51.04	8	51.04	4	51.04	6	51.04	6	51.04	6	51.04	8
51.08	9	51.08	3	51.08	5	51.08	9	51.08	10	51.08	11	51.08	10
51.12	6	51.12	3	51.12	4	51.12	7	51.12	12	51.12	8	51.12	3
51.16	14	51.16	10	51.16	10	51.16	6	51.16	9	51.16	1	51.16	9
51.2	5	51.2	10	51.2	4	51.2	5	51.2	7	51.2	7	51.2	11
51.24	11	51.24	4	51.24	9	51.24	3	51.24	7	51.24	3	51.24	4
51.28	7	51.28	7	51.28	6	51.28	8	51.28	4	51.28	5	51.28	4
51.32	4	51.32	6	51.32	9	51.32	5	51.32	7	51.32	6	51.32	12
51.36	10	51.36	7	51.36	10	51.36	7	51.36	12	51.36	6	51.36	8
51.4	3	51.4	11	51.4	7	51.4	8	51.4	11	51.4	6	51.4	4
51.44	3	51.44	8	51.44	7	51.44	7	51.44	15	51.44	7	51.44	7
51.48	9	51.48	12	51.48	11	51.48	5	51.48	10	51.48	9	51.48	9
51.52	13	51.52	8	51.52	5	51.52	4	51.52	10	51.52	3	51.52	4
51.56	9	51.56	4	51.56	9	51.56	5	51.56	9	51.56	8	51.56	13
51.6	8	51.6	6	51.6	4	51.6	9	51.6	10	51.6	5	51.6	11
51.64	9	51.64	4	51.64	9	51.64	9	51.64	7	51.64	5	51.64	8
51.68	9	51.68	5	51.68	10	51.68	5	51.68	9	51.68	6	51.68	3
51.72	25	51.72	9	51.72	8	51.72	5	51.72	11	51.72	7	51.72	6
51.76	26	51.76	7	51.76	10	51.76	10	51.76	10	51.76	5	51.76	6
51.8	10	51.8	11	51.8	3	51.8	5	51.8	9	51.8	7	51.8	4
51.84	16	51.84	9	51.84	5	51.84	8	51.84	2	51.84	8	51.84	5
51.88	21	51.88	10	51.88	3	51.88	2	51.88	11	51.88	6	51.88	8
51.92	7	51.92	8	51.92	3	51.92	8	51.92	8	51.92	6	51.92	6
51.96	5	51.96	7	51.96	8	51.96	8	51.96	7	51.96	6	51.96	8
52	6	52	8	52	7	52	10	52	5	52	6	52	8
52.04	6	52.04	6	52.04	2	52.04	2	52.04	7	52.04	6	52.04	3
52.08	0	52.08	11	52.08	12	52.08	7	52.08	5	52.08	8	52.08	5
52.12	5	52.12	9	52.12	5	52.12	4	52.12	7	52.12	7	52.12	8
52.16	10	52.16	6	52.16	11	52.16	2	52.16	10	52.16	7	52.16	7
52.2	6	52.2	7	52.2	7	52.2	2	52.2	9	52.2	7	52.2	10
52.24	8	52.24	9	52.24	6	52.24	5	52.24	11	52.24	10	52.24	6
52.28	4	52.28	7	52.28	10	52.28	2	52.28	7	52.28	2	52.28	3
52.32	5	52.32	7	52.32	4	52.32	7	52.32	10	52.32	8	52.32	4
52.36	4	52.36	8	52.36	5	52.36	8	52.36	10	52.36	7	52.36	9
52.4	8	52.4	7	52.4	11	52.4	3	52.4	8	52.4	5	52.4	6
52.44	4	52.44	4	52.44	5	52.44	6	52.44	12	52.44	11	52.44	4
52.48	6	52.48	8	52.48	14	52.48	4	52.48	6	52.48	2	52.48	12
52.52	6	52.52	6	52.52	2	52.52	3	52.52	4	52.52	7	52.52	6
52.56	7	52.56	9	52.56	4	52.56	4	52.56	5	52.56	4	52.56	6
52.6	7	52.6	13	52.6	9	52.6	4	52.6	9	52.6	11	52.6	8
52.64	11	52.64	9	52.64	4	52.64	6	52.64	7	52.64	14	52.64	3
52.68	8	52.68	3	52.68	8	52.68	6	52.68	7	52.68	3	52.68	8
52.72	4	52.72	4	52.72	5	52.72	7	52.72	6	52.72	7	52.72	5
52.76	7	52.76	5	52.76	6	52.76	8	52.76	9	52.76	4	52.76	11
52.8	5	52.8	4	52.8	9	52.8	10	52.8	11	52.8	2	52.8	6
52.84	6	52.84	12	52.84	6	52.84	3	52.84	8	52.84	9	52.84	4
52.88	9	52.88	12	52.88	11	52.88	3	52.88	6	52.88	4	52.88	7
52.92	8	52.92	8	52.92	12	52.92	9	52.92	12	52.92	7	52.92	7
52.96	5	52.96	16	52.96	8	52.96	7	52.96	9	52.96	9	52.96	7
53	10	53	9	53	12	53	6	53	12	53	4	53	7
53.04	1	53.04	8	53.04	10	53.04	1	53.04	11	53.04	8	53.04	9
53.08	6	53.08	8	53.08	2	53.08	4	53.08	12	53.08	6	53.08	7
53.12	5	53.12	10	53.12	11	53.12	4	53.12	5	53.12	4	53.12	7
53.16	6	53.16	12	53.16	8	53.16	8	53.16	16	53.16	6	53.16	3
53.2	6	53.2	12	53.2	5	53.2	6	53.2	6	53.2	6	53.2	3
53.24	6	53.24	9	53.24	9	53.24	5	53.24	11	53.24	6	53.24	7
53.28	4	53.28	5	53.28	8	53.28	6	53.28	9	53.28	8	53.28	7
53.32	6	53.32	8	53.32	8	53.32	1	53.32	4	53.32	7	53.32	4
53.36	10	53.36	9	53.36	12	53.36	4	53.36	14	53.36	5	53.36	6
53.4	9	53.4	10	53.4	4	53.4	7	53.4	13	53.4	8	53.4	5
53.44	6	53.44	3	53.44	7	53.44	4	53.44	8	53.44	6	53.44	7
53.48	4	53.48	5	53.48	8	53.48	1	53.48	6	53.48	6	53.48	3
53.52	8	53.52	10	53.52	6	53.52	7	53.52	20	53.52	8	53.52	3
53.56	7	53.56	6	53.56	9	53.56	5	53.56	11	53.56	5	53.56	3
53.6	7	53.6	7	53.6	11	53.6	8	53.6	9	53.6	7	53.6	3
53.64	5	53.64	7	53.64	6	53.64	3	53.64	8	53.64	5	53.64	3
53.68	12	53.68	10	53.68	3	53.68	7	53.68	8	53.68	6	53.68	10
53.72	5	53.72	4	53.72	2	53.72	4	53.72	5	53.72	3	53.72	6
53.76	9	53.76	4	53.76	9	53.76	9	53.76	7	53.76	8	53.76	5
53.8	6	53.8	8	53.8	10	53.8	6	53.8	11	53.8	6	53.8	4
53.84	6	53.84	4	53.84	6	53.84	5	53.84	12	53.84	4	53.84	4
53.88	6	53.88	8	53.88	4	53.88	5	53.88	9	53.88	7	53.88	8
53.92	11	53.92	5	53.92	11	53.92	4	53.92	13	53.92	9	53.92	4
53.96	7	53.96	15	53.96	5	53.96	5	53.96	4	53.96	6	53.96	7
54	8	54	14	54	6	54	8	54	13	54	5	54	8
54.04	5	54.04	6	54.04	11	54.04	3	54.04	5	54.04	10	54.04	5
54.08	2	54.08	16	54.08	6	54.08	3	54.08	6	54.08	5	54.08	6
54.12	7	54.12	9	54.12	5	54.12	6	54.12	6	54.12	5	54.12	8
54.16	3	54.16	12	54.16	7	54.16	3	54.16	7	54.16	6	54.16	8
54.2	5	54.2	6	54.2	4	54.2	4	54.2	8	54.2	7	54.2	6
54.24	6	54.24	7	54.24	7	54.24	4	54.24	8	54.24	5	54.24	6
54.28	5	54.28	10	54.28	6	54.28	3	54.28	4	54.28	7	54.28	6
54.32	5	54.32	3	54.32	7	54.32	7	54.32	9	54.32	9	54.32	9
54.36	7	54.36	9	54.36	8	54.36	6	54.36	6	54.36	6	54.36	4
54.4	7	54.4	5	54.4	11	54.4	3	54.4	1	54.4	6	54.4	7
54.44	11	54.44	11	54.44	7	54.44	3	54.44	9	54.44	8	54.44	15
54.48	12	54.48	14	54.48	11	54.48	14	54.48	7	54.48	4	54.48	17
54.52	13	54.52	14	54.52	6	54.52	7	54.52	5	54.52	13	54.52	17
54.56	20	54.56	17	54.56	13	54.56	5	54.56	14	54.56	4	54.56	13
54.6	6	54.6	4	54.6	9	54.6	1	54.6	6	54.6	8	54.6	10
54.64	8	54.64	12	54.64	11	54.64	6	54.64	11	54.64	3	54.64	16
54.68	5	54.68	11	54.68	5	54.68	7	54.68	5	54.68	15	54.68	15
54.72	22	54.72	9	54.72	13	54.72	10	54.72	13	54.72	7	54.72	13
54.76	18	54.76	12	54.76	7	54.76	6	54.76	9	54.76	12	54.76	13
54.8	15	54.8	7	54.8	14	54.8	7	54.8	12	54.8	9	54.8	11
54.84	5	54.84	12	54.84	6	54.84	6	54.84	10	54.84	8	54.84	12
54.88	17	54.88	16	54.88	8	54.88	9	54.88	13	54.88	12	54.88	10
54.92	14	54.92	14	54.92	10	54.92	11	54.92	12	54.92	13	54.92	5
54.96	8	54.96	12	54.96	8	54.96	9	54.96	6	54.96	18	54.96	8
55	12	55	11	55	6	55	13	55	8	55	17	55	11
55.04	9	55.04	15	55.04	8	55.04	10	55.04	11	55.04	9	55.04	9
55.08	11	55.08	17	55.08	9	55.08	7	55.08	11	55.08	8	55.08	10
55.12	9	55.12	10	55.12	6	55.12	7	55.12	8	55.12	11	55.12	10
55.16	9	55.16	10	55.16	7	55.16	10	55.16	5	55.16	8	55.16	6
55.2	8	55.2	10	55.2	10	55.2	4	55.2	7	55.2	4	55.2	8
55.24	9	55.24	6	55.24	9	55.24	5	55.24	8	55.24	9	55.24	6
55.28	5	55.28	4	55.28	8	55.28	4	55.28	10	55.28	10	55.28	8
55.32	6	55.32	6	55.32	6	55.32	6	55.32	7	55.32	2	55.32	9
55.36	5	55.36	10	55.36	5	55.36	12	55.36	15	55.36	8	55.36	7
55.4	6	55.4	5	55.4	4	55.4	8	55.4	12	55.4	6	55.4	0
55.44	9	55.44	8	55.44	5	55.44	5	55.44	10	55.44	5	55.44	8
55.48	5	55.48	9	55.48	5	55.48	3	55.48	8	55.48	6	55.48	10
55.52	7	55.52	7	55.52	12	55.52	9	55.52	9	55.52	14	55.52	11
55.56	6	55.56	9	55.56	11	55.56	8	55.56	9	55.56	9	55.56	7
55.6	3	55.6	6	55.6	6	55.6	7	55.6	8	55.6	5	55.6	5
55.64	2	55.64	9	55.64	8	55.64	5	55.64	7	55.64	6	55.64	6
55.68	13	55.68	5	55.68	8	55.68	5	55.68	3	55.68	16	55.68	4
55.72	6	55.72	4	55.72	7	55.72	7	55.72	9	55.72	8	55.72	4
55.76	7	55.76	13	55.76	9	55.76	6	55.76	12	55.76	8	55.76	4
55.8	9	55.8	5	55.8	6	55.8	4	55.8	9	55.8	6	55.8	12
55.84	7	55.84	4	55.84	7	55.84	13	55.84	3	55.84	4	55.84	8
55.88	7	55.88	8	55.88	5	55.88	16	55.88	11	55.88	5	55.88	7
55.92	10	55.92	11	55.92	13	55.92	10	55.92	8	55.92	6	55.92	8
55.96	8	55.96	8	55.96	7	55.96	2	55.96	9	55.96	6	55.96	8
56	7	56	11	56	14	56	14	56	9	56	6	56	6
56.04	8	56.04	13	56.04	5	56.04	5	56.04	9	56.04	6	56.04	4
56.08	4	56.08	9	56.08	8	56.08	3	56.08	10	56.08	5	56.08	9
56.12	7	56.12	8	56.12	3	56.12	4	56.12	6	56.12	9	56.12	7
56.16	6	56.16	11	56.16	11	56.16	8	56.16	7	56.16	12	56.16	4
56.2	11	56.2	9	56.2	12	56.2	7	56.2	4	56.2	8	56.2	3
56.24	5	56.24	6	56.24	7	56.24	6	56.24	10	56.24	8	56.24	8
56.28	11	56.28	5	56.28	7	56.28	4	56.28	10	56.28	7	56.28	8
56.32	5	56.32	9	56.32	3	56.32	7	56.32	9	56.32	7	56.32	8
56.36	8	56.36	7	56.36	6	56.36	4	56.36	6	56.36	7	56.36	6
56.4	8	56.4	7	56.4	10	56.4	6	56.4	5	56.4	7	56.4	11
56.44	7	56.44	8	56.44	14	56.44	5	56.44	10	56.44	13	56.44	4
56.48	5	56.48	10	56.48	12	56.48	2	56.48	10	56.48	8	56.48	8
56.52	10	56.52	10	56.52	13	56.52	5	56.52	8	56.52	7	56.52	11
56.56	6	56.56	10	56.56	6	56.56	8	56.56	11	56.56	7	56.56	6
56.6	10	56.6	13	56.6	8	56.6	7	56.6	7	56.6	6	56.6	4
56.64	9	56.64	6	56.64	11	56.64	3	56.64	11	56.64	7	56.64	9
56.68	6	56.68	8	56.68	11	56.68	3	56.68	7	56.68	5	56.68	10
56.72	4	56.72	7	56.72	9	56.72	9	56.72	12	56.72	5	56.72	9
56.76	11	56.76	14	56.76	11	56.76	7	56.76	7	56.76	10	56.76	10
56.8	6	56.8	9	56.8	7	56.8	4	56.8	17	56.8	5	56.8	8
56.84	14	56.84	18	56.84	5	56.84	10	56.84	6	56.84	7	56.84	4
56.88	10	56.88	8	56.88	13	56.88	8	56.88	15	56.88	5	56.88	11
56.92	10	56.92	10	56.92	7	56.92	6	56.92	9	56.92	10	56.92	8
56.96	3	56.96	7	56.96	6	56.96	7	56.96	2	56.96	8	56.96	7
57	6	57	10	57	13	57	3	57	7	57	12	57	11
57.04	11	57.04	18	57.04	6	57.04	4	57.04	11	57.04	12	57.04	7
57.08	13	57.08	10	57.08	6	57.08	6	57.08	11	57.08	7	57.08	9
57.12	7	57.12	13	57.12	10	57.12	7	57.12	13	57.12	8	57.12	9
57.16	12	57.16	12	57.16	3	57.16	4	57.16	9	57.16	6	57.16	4
57.2	14	57.2	12	57.2	10	57.2	6	57.2	9	57.2	6	57.2	5
57.24	7	57.24	12	57.24	8	57.24	6	57.24	10	57.24	11	57.24	9
57.28	9	57.28	16	57.28	6	57.28	7	57.28	7	57.28	6	57.28	11
57.32	14	57.32	10	57.32	11	57.32	5	57.32	20	57.32	10	57.32	6
57.36	10	57.36	11	57.36	7	57.36	10	57.36	12	57.36	4	57.36	12
57.4	20	57.4	15	57.4	13	57.4	12	57.4	8	57.4	8	57.4	13
57.44	7	57.44	14	57.44	12	57.44	5	57.44	7	57.44	15	57.44	9
57.48	17	57.48	12	57.48	20	57.48	15	57.48	9	57.48	9	57.48	10
57.52	12	57.52	13	57.52	15	57.52	11	57.52	13	57.52	10	57.52	8
57.56	18	57.56	12	57.56	11	57.56	4	57.56	12	57.56	16	57.56	19
57.6	10	57.6	14	57.6	12	57.6	13	57.6	9	57.6	6	57.6	14
57.64	17	57.64	13	57.64	16	57.64	14	57.64	13	57.64	9	57.64	20
57.68	11	57.68	8	57.68	9	57.68	8	57.68	12	57.68	13	57.68	11
57.72	16	57.72	13	57.72	11	57.72	8	57.72	13	57.72	5	57.72	14
57.76	18	57.76	19	57.76	17	57.76	7	57.76	18	57.76	8	57.76	16
57.8	19	57.8	18	57.8	14	57.8	14	57.8	12	57.8	16	57.8	21
57.84	28	57.84	19	57.84	12	57.84	15	57.84	17	57.84	6	57.84	19
57.88	23	57.88	14	57.88	8	57.88	10	57.88	12	57.88	6	57.88	21
57.92	23	57.92	14	57.92	15	57.92	16	57.92	14	57.92	16	57.92	17
57.96	19	57.96	18	57.96	5	57.96	13	57.96	26	57.96	17	57.96	15
58	13	58	19	58	15	58	22	58	14	58	14	58	9
58.04	20	58.04	12	58.04	15	58.04	14	58.04	9	58.04	14	58.04	14
58.08	14	58.08	19	58.08	16	58.08	9	58.08	13	58.08	9	58.08	19
58.12	18	58.12	16	58.12	11	58.12	21	58.12	17	58.12	7	58.12	6
58.16	20	58.16	18	58.16	14	58.16	18	58.16	19	58.16	10	58.16	12
58.2	14	58.2	17	58.2	10	58.2	21	58.2	16	58.2	12	58.2	9
58.24	10	58.24	17	58.24	10	58.24	9	58.24	14	58.24	9	58.24	14
58.28	17	58.28	18	58.28	10	58.28	10	58.28	12	58.28	13	58.28	11
58.32	10	58.32	13	58.32	12	58.32	12	58.32	14	58.32	10	58.32	10
58.36	14	58.36	22	58.36	11	58.36	9	58.36	11	58.36	14	58.36	14
58.4	11	58.4	16	58.4	9	58.4	10	58.4	10	58.4	6	58.4	7
58.44	15	58.44	5	58.44	14	58.44	17	58.44	13	58.44	11	58.44	14
58.48	14	58.48	7	58.48	12	58.48	8	58.48	8	58.48	11	58.48	7
58.52	18	58.52	15	58.52	10	58.52	19	58.52	8	58.52	10	58.52	9
58.56	11	58.56	10	58.56	7	58.56	8	58.56	10	58.56	4	58.56	15
58.6	11	58.6	10	58.6	11	58.6	9	58.6	13	58.6	10	58.6	10
58.64	7	58.64	16	58.64	11	58.64	8	58.64	9	58.64	13	58.64	6
58.68	15	58.68	9	58.68	9	58.68	11	58.68	11	58.68	9	58.68	12
58.72	11	58.72	10	58.72	8	58.72	9	58.72	9	58.72	7	58.72	7
58.76	9	58.76	16	58.76	6	58.76	8	58.76	10	58.76	8	58.76	9
58.8	15	58.8	10	58.8	11	58.8	4	58.8	9	58.8	7	58.8	13
58.84	23	58.84	11	58.84	5	58.84	8	58.84	8	58.84	9	58.84	21
58.88	41	58.88	18	58.88	18	58.88	9	58.88	12	58.88	12	58.88	18
58.92	20	58.92	11	58.92	10	58.92	8	58.92	10	58.92	8	58.92	13
58.96	10	58.96	13	58.96	13	58.96	4	58.96	6	58.96	7	58.96	17
59	14	59	7	59	11	59	7	59	6	59	9	59	18
59.04	19	59.04	9	59.04	14	59.04	16	59.04	4	59.04	15	59.04	13
59.08	8	59.08	14	59.08	12	59.08	7	59.08	21	59.08	5	59.08	8
59.12	13	59.12	17	59.12	10	59.12	6	59.12	14	59.12	9	59.12	10
59.16	10	59.16	10	59.16	11	59.16	5	59.16	11	59.16	9	59.16	13
59.2	8	59.2	14	59.2	6	59.2	12	59.2	14	59.2	21	59.2	8
59.24	11	59.24	18	59.24	10	59.24	10	59.24	16	59.24	25	59.24	18
59.28	15	59.28	14	59.28	6	59.28	10	59.28	10	59.28	11	59.28	24
59.32	15	59.32	12	59.32	9	59.32	9	59.32	7	59.32	10	59.32	18
59.36	5	59.36	15	59.36	14	59.36	5	59.36	11	59.36	16	59.36	18
59.4	11	59.4	19	59.4	18	59.4	7	59.4	15	59.4	10	59.4	15
59.44	9	59.44	15	59.44	11	59.44	15	59.44	11	59.44	11	59.44	11
59.48	8	59.48	11	59.48	14	59.48	10	59.48	9	59.48	16	59.48	10
59.52	9	59.52	12	59.52	15	59.52	9	59.52	15	59.52	10	59.52	13
59.56	30	59.56	14	59.56	9	59.56	9	59.56	6	59.56	12	59.56	15
59.6	15	59.6	8	59.6	13	59.6	10	59.6	5	59.6	6	59.6	15
59.64	14	59.64	16	59.64	12	59.64	9	59.64	10	59.64	8	59.64	12
59.68	12	59.68	10	59.68	12	59.68	7	59.68	10	59.68	6	59.68	18
59.72	24	59.72	10	59.72	12	59.72	7	59.72	9	59.72	11	59.72	6
59.76	11	59.76	11	59.76	11	59.76	12	59.76	6	59.76	4	59.76	8
59.8	9	59.8	11	59.8	10	59.8	7	59.8	11	59.8	12	59.8	5
59.84	10	59.84	10	59.84	6	59.84	1	59.84	10	59.84	8	59.84	6
59.88	8	59.88	12	59.88	16	59.88	5	59.88	14	59.88	7	59.88	4
59.92	7	59.92	8	59.92	9	59.92	7	59.92	15	59.92	5	59.92	4
59.96	9	59.96	8	59.96	9	59.96	7	59.96	9	59.96	6	59.96	9
60	12	60	10	60	9	60	5	60	11	60	6	60	12
60.04	10	60.04	10	60.04	6	60.04	11	60.04	9	60.04	4	60.04	6
60.08	4	60.08	7	60.08	12	60.08	12	60.08	4	60.08	9	60.08	8
60.12	8	60.12	4	60.12	6	60.12	7	60.12	12	60.12	15	60.12	11
60.16	7	60.16	7	60.16	5	60.16	8	60.16	6	60.16	10	60.16	10
60.2	6	60.2	16	60.2	7	60.2	5	60.2	8	60.2	10	60.2	11
60.24	12	60.24	13	60.24	6	60.24	6	60.24	11	60.24	12	60.24	9
60.28	14	60.28	15	60.28	10	60.28	7	60.28	10	60.28	7	60.28	23
60.32	12	60.32	19	60.32	19	60.32	11	60.32	9	60.32	14	60.32	20
60.36	11	60.36	19	60.36	17	60.36	9	60.36	10	60.36	15	60.36	23
60.4	10	60.4	8	60.4	10	60.4	9	60.4	6	60.4	7	60.4	48
60.44	13	60.44	12	60.44	9	60.44	3	60.44	10	60.44	10	60.44	32
60.48	8	60.48	8	60.48	8	60.48	5	60.48	4	60.48	12	60.48	18
60.52	13	60.52	9	60.52	13	60.52	12	60.52	13	60.52	8	60.52	20
60.56	5	60.56	9	60.56	5	60.56	11	60.56	13	60.56	3	60.56	30
60.6	5	60.6	2	60.6	9	60.6	8	60.6	5	60.6	8	60.6	16
60.64	10	60.64	9	60.64	6	60.64	8	60.64	3	60.64	4	60.64	7
60.68	9	60.68	10	60.68	10	60.68	5	60.68	8	60.68	4	60.68	6
60.72	10	60.72	4	60.72	1	60.72	4	60.72	8	60.72	6	60.72	5
60.76	5	60.76	13	60.76	4	60.76	5	60.76	6	60.76	5	60.76	8
60.8	3	60.8	4	60.8	5	60.8	5	60.8	8	60.8	1	60.8	8
60.84	4	60.84	9	60.84	8	60.84	8	60.84	10	60.84	6	60.84	2
60.88	6	60.88	8	60.88	6	60.88	3	60.88	10	60.88	9	60.88	4
60.92	6	60.92	8	60.92	5	60.92	2	60.92	8	60.92	7	60.92	3
60.96	2	60.96	9	60.96	10	60.96	5	60.96	10	60.96	2	60.96	2
61	4	61	9	61	7	61	6	61	10	61	7	61	4
61.04	2	61.04	9	61.04	10	61.04	9	61.04	8	61.04	8	61.04	3
61.08	9	61.08	11	61.08	9	61.08	5	61.08	10	61.08	3	61.08	5
61.12	10	61.12	4	61.12	12	61.12	5	61.12	8	61.12	8	61.12	1
61.16	8	61.16	9	61.16	5	61.16	3	61.16	11	61.16	8	61.16	6
61.2	4	61.2	9	61.2	4	61.2	5	61.2	2	61.2	9	61.2	6
61.24	8	61.24	6	61.24	7	61.24	7	61.24	7	61.24	10	61.24	9
61.28	1	61.28	10	61.28	9	61.28	7	61.28	6	61.28	6	61.28	7
61.32	7	61.32	3	61.32	7	61.32	3	61.32	10	61.32	8	61.32	3
61.36	11	61.36	6	61.36	4	61.36	5	61.36	5	61.36	5	61.36	4
61.4	7	61.4	4	61.4	7	61.4	7	61.4	5	61.4	4	61.4	3
61.44	9	61.44	3	61.44	13	61.44	2	61.44	2	61.44	9	61.44	12
61.48	3	61.48	7	61.48	4	61.48	3	61.48	6	61.48	7	61.48	9
61.52	9	61.52	3	61.52	3	61.52	3	61.52	9	61.52	8	61.52	9
61.56	4	61.56	6	61.56	9	61.56	6	61.56	7	61.56	7	61.56	4
61.6	3	61.6	2	61.6	8	61.6	5	61.6	9	61.6	9	61.6	6
61.64	7	61.64	8	61.64	7	61.64	6	61.64	6	61.64	4	61.64	9
61.68	4	61.68	3	61.68	6	61.68	6	61.68	6	61.68	8	61.68	4
61.72	4	61.72	5	61.72	6	61.72	4	61.72	8	61.72	7	61.72	9
61.76	5	61.76	5	61.76	6	61.76	4	61.76	5	61.76	2	61.76	4
61.8	2	61.8	6	61.8	5	61.8	6	61.8	10	61.8	7	61.8	7
61.84	4	61.84	6	61.84	5	61.84	3	61.84	3	61.84	7	61.84	1
61.88	7	61.88	6	61.88	7	61.88	4	61.88	11	61.88	4	61.88	7
61.92	6	61.92	10	61.92	6	61.92	3	61.92	5	61.92	6	61.92	8
61.96	6	61.96	9	61.96	5	61.96	4	61.96	4	61.96	9	61.96	11
62	7	62	7	62	7	62	6	62	8	62	5	62	5
62.04	7	62.04	3	62.04	5	62.04	6	62.04	8	62.04	8	62.04	4
62.08	12	62.08	7	62.08	9	62.08	4	62.08	14	62.08	5	62.08	7
62.12	5	62.12	3	62.12	6	62.12	3	62.12	7	62.12	3	62.12	4
62.16	6	62.16	5	62.16	4	62.16	1	62.16	7	62.16	7	62.16	4
62.2	4	62.2	3	62.2	5	62.2	5	62.2	14	62.2	2	62.2	3
62.24	16	62.24	9	62.24	7	62.24	5	62.24	6	62.24	6	62.24	2
62.28	7	62.28	7	62.28	10	62.28	4	62.28	6	62.28	4	62.28	4
62.32	3	62.32	12	62.32	5	62.32	3	62.32	9	62.32	7	62.32	8
62.36	8	62.36	13	62.36	10	62.36	4	62.36	7	62.36	9	62.36	7
62.4	10	62.4	7	62.4	6	62.4	6	62.4	8	62.4	4	62.4	3
62.44	7	62.44	5	62.44	10	62.44	6	62.44	14	62.44	5	62.44	2
62.48	12	62.48	4	62.48	4	62.48	11	62.48	5	62.48	10	62.48	9
62.52	7	62.52	5	62.52	4	62.52	8	62.52	8	62.52	6	62.52	5
62.56	5	62.56	8	62.56	15	62.56	5	62.56	9	62.56	4	62.56	7
62.6	5	62.6	6	62.6	1	62.6	7	62.6	11	62.6	6	62.6	6
62.64	7	62.64	14	62.64	6	62.64	2	62.64	4	62.64	9	62.64	2
62.68	6	62.68	2	62.68	5	62.68	4	62.68	6	62.68	5	62.68	4
62.72	4	62.72	7	62.72	9	62.72	4	62.72	4	62.72	4	62.72	5
62.76	3	62.76	6	62.76	3	62.76	6	62.76	8	62.76	8	62.76	6
62.8	4	62.8	4	62.8	7	62.8	6	62.8	7	62.8	6	62.8	4
62.84	4	62.84	3	62.84	8	62.84	3	62.84	5	62.84	5	62.84	8
62.88	6	62.88	5	62.88	7	62.88	7	62.88	8	62.88	6	62.88	5
62.92	3	62.92	4	62.92	6	62.92	3	62.92	9	62.92	3	62.92	8
62.96	4	62.96	9	62.96	5	62.96	5	62.96	13	62.96	8	62.96	12
63	4	63	6	63	5	63	3	63	10	63	5	63	6
63.04	8	63.04	7	63.04	6	63.04	4	63.04	7	63.04	1	63.04	10
63.08	4	63.08	5	63.08	6	63.08	4	63.08	2	63.08	8	63.08	10
63.12	4	63.12	8	63.12	11	63.12	7	63.12	10	63.12	6	63.12	10
63.16	9	63.16	6	63.16	8	63.16	7	63.16	6	63.16	3	63.16	7
63.2	7	63.2	9	63.2	6	63.2	4	63.2	12	63.2	12	63.2	4
63.24	6	63.24	8	63.24	7	63.24	3	63.24	2	63.24	8	63.24	5
63.28	6	63.28	7	63.28	9	63.28	5	63.28	7	63.28	3	63.28	9
63.32	11	63.32	9	63.32	5	63.32	6	63.32	10	63.32	7	63.32	4
63.36	8	63.36	7	63.36	6	63.36	6	63.36	4	63.36	5	63.36	6
63.4	6	63.4	4	63.4	9	63.4	9	63.4	8	63.4	6	63.4	3
63.44	4	63.44	8	63.44	8	63.44	5	63.44	12	63.44	11	63.44	10
63.48	6	63.48	11	63.48	9	63.48	7	63.48	11	63.48	11	63.48	4
63.52	11	63.52	8	63.52	6	63.52	6	63.52	3	63.52	6	63.52	12
63.56	7	63.56	11	63.56	7	63.56	5	63.56	5	63.56	5	63.56	10
63.6	11	63.6	6	63.6	6	63.6	10	63.6	9	63.6	6	63.6	6
63.64	3	63.64	8	63.64	10	63.64	6	63.64	5	63.64	3	63.64	7
63.68	2	63.68	5	63.68	2	63.68	4	63.68	11	63.68	8	63.68	9
63.72	2	63.72	10	63.72	9	63.72	9	63.72	10	63.72	5	63.72	8
63.76	7	63.76	7	63.76	6	63.76	3	63.76	10	63.76	3	63.76	6
63.8	5	63.8	9	63.8	6	63.8	4	63.8	8	63.8	6	63.8	3
63.84	4	63.84	2	63.84	5	63.84	6	63.84	8	63.84	9	63.84	3
63.88	8	63.88	5	63.88	9	63.88	6	63.88	9	63.88	5	63.88	5
63.92	5	63.92	5	63.92	12	63.92	7	63.92	13	63.92	11	63.92	5
63.96	9	63.96	7	63.96	10	63.96	6	63.96	8	63.96	9	63.96	4
64	8	64	6	64	11	64	1	64	2	64	8	64	9
64.04	8	64.04	7	64.04	11	64.04	6	64.04	8	64.04	3	64.04	4
64.08	11	64.08	5	64.08	5	64.08	5	64.08	3	64.08	8	64.08	5
64.12	8	64.12	3	64.12	7	64.12	4	64.12	6	64.12	5	64.12	4
64.16	8	64.16	8	64.16	11	64.16	7	64.16	14	64.16	7	64.16	7
64.2	7	64.2	8	64.2	4	64.2	5	64.2	16	64.2	5	64.2	5
64.24	4	64.24	7	64.24	7	64.24	4	64.24	6	64.24	5	64.24	6
64.28	7	64.28	4	64.28	2	64.28	5	64.28	10	64.28	5	64.28	5
64.32	10	64.32	13	64.32	5	64.32	9	64.32	9	64.32	9	64.32	10
64.36	4	64.36	8	64.36	4	64.36	4	64.36	6	64.36	4	64.36	2
64.4	7	64.4	8	64.4	6	64.4	2	64.4	6	64.4	7	64.4	6
64.44	3	64.44	8	64.44	6	64.44	8	64.44	6	64.44	10	64.44	6
64.48	1	64.48	8	64.48	10	64.48	6	64.48	6	64.48	11	64.48	16
64.52	8	64.52	8	64.52	6	64.52	7	64.52	8	64.52	7	64.52	13
64.56	7	64.56	5	64.56	8	64.56	3	64.56	10	64.56	5	64.56	3
64.6	3	64.6	7	64.6	8	64.6	6	64.6	10	64.6	13	64.6	8
64.64	3	64.64	11	64.64	10	64.64	7	64.64	11	64.64	7	64.64	5
64.68	6	64.68	12	64.68	6	64.68	4	64.68	10	64.68	9	64.68	15
64.72	5	64.72	5	64.72	5	64.72	5	64.72	9	64.72	6	64.72	4
64.76	9	64.76	8	64.76	6	64.76	9	64.76	8	64.76	6	64.76	4
64.8	3	64.8	4	64.8	10	64.8	3	64.8	9	64.8	5	64.8	6
64.84	8	64.84	5	64.84	8	64.84	3	64.84	7	64.84	7	64.84	7
64.88	7	64.88	7	64.88	10	64.88	3	64.88	2	64.88	5	64.88	5
64.92	3	64.92	7	64.92	4	64.92	9	64.92	5	64.92	10	64.92	4
64.96	6	64.96	5	64.96	5	64.96	3	64.96	7	64.96	5	64.96	10
65	6	65	15	65	5	65	4	65	9	65	8	65	5
65.04	11	65.04	4	65.04	10	65.04	12	65.04	9	65.04	1	65.04	6
65.08	3	65.08	6	65.08	3	65.08	4	65.08	8	65.08	1	65.08	7
65.12	7	65.12	8	65.12	3	65.12	3	65.12	4	65.12	2	65.12	4
65.16	6	65.16	7	65.16	4	65.16	8	65.16	8	65.16	4	65.16	8
65.2	8	65.2	7	65.2	6	65.2	4	65.2	6	65.2	9	65.2	5
65.24	7	65.24	1	65.24	5	65.24	5	65.24	7	65.24	3	65.24	8
65.28	12	65.28	4	65.28	6	65.28	1	65.28	5	65.28	3	65.28	3
65.32	7	65.32	4	65.32	10	65.32	3	65.32	9	65.32	7	65.32	7
65.36	3	65.36	4	65.36	7	65.36	5	65.36	4	65.36	4	65.36	3
65.4	9	65.4	7	65.4	3	65.4	5	65.4	6	65.4	2	65.4	6
65.44	5	65.44	9	65.44	3	65.44	5	65.44	9	65.44	11	65.44	6
65.48	4	65.48	4	65.48	8	65.48	2	65.48	4	65.48	2	65.48	0
65.52	3	65.52	9	65.52	6	65.52	2	65.52	10	65.52	7	65.52	2
65.56	0	65.56	5	65.56	5	65.56	2	65.56	5	65.56	4	65.56	2
65.6	8	65.6	10	65.6	5	65.6	4	65.6	4	65.6	3	65.6	5
65.64	5	65.64	7	65.64	5	65.64	2	65.64	4	65.64	5	65.64	0
65.68	6	65.68	3	65.68	4	65.68	6	65.68	6	65.68	6	65.68	5
65.72	5	65.72	3	65.72	7	65.72	4	65.72	8	65.72	5	65.72	4
65.76	5	65.76	6	65.76	5	65.76	3	65.76	8	65.76	7	65.76	1
65.8	6	65.8	3	65.8	10	65.8	7	65.8	9	65.8	5	65.8	2
65.84	2	65.84	9	65.84	4	65.84	3	65.84	9	65.84	6	65.84	5
65.88	5	65.88	8	65.88	6	65.88	4	65.88	6	65.88	6	65.88	1
65.92	3	65.92	6	65.92	3	65.92	4	65.92	7	65.92	5	65.92	6
65.96	6	65.96	6	65.96	8	65.96	5	65.96	6	65.96	5	65.96	8
66	5	66	4	66	6	66	3	66	8	66	3	66	3
66.04	6	66.04	3	66.04	3	66.04	7	66.04	11	66.04	6	66.04	5
66.08	9	66.08	4	66.08	6	66.08	4	66.08	6	66.08	2	66.08	3
66.12	5	66.12	3	66.12	5	66.12	6	66.12	8	66.12	3	66.12	3
66.16	1	66.16	8	66.16	3	66.16	6	66.16	8	66.16	5	66.16	3
66.2	6	66.2	6	66.2	9	66.2	4	66.2	4	66.2	7	66.2	4
66.24	6	66.24	4	66.24	11	66.24	4	66.24	4	66.24	4	66.24	5
66.28	6	66.28	7	66.28	5	66.28	2	66.28	8	66.28	1	66.28	2
66.32	6	66.32	6	66.32	1	66.32	2	66.32	5	66.32	8	66.32	6
66.36	4	66.36	11	66.36	4	66.36	1	66.36	9	66.36	2	66.36	4
66.4	3	66.4	5	66.4	5	66.4	8	66.4	4	66.4	5	66.4	6
66.44	3	66.44	5	66.44	10	66.44	4	66.44	5	66.44	10	66.44	4
66.48	9	66.48	1	66.48	3	66.48	4	66.48	11	66.48	4	66.48	6
66.52	3	66.52	7	66.52	4	66.52	4	66.52	8	66.52	4	66.52	4
66.56	5	66.56	11	66.56	4	66.56	6	66.56	8	66.56	5	66.56	7
66.6	5	66.6	4	66.6	5	66.6	2	66.6	4	66.6	7	66.6	2
66.64	1	66.64	8	66.64	2	66.64	6	66.64	4	66.64	5	66.64	8
66.68	5	66.68	0	66.68	5	66.68	3	66.68	13	66.68	6	66.68	3
66.72	9	66.72	3	66.72	6	66.72	6	66.72	3	66.72	2	66.72	12
66.76	6	66.76	8	66.76	5	66.76	5	66.76	5	66.76	8	66.76	5
66.8	13	66.8	8	66.8	2	66.8	5	66.8	6	66.8	8	66.8	9
66.84	27	66.84	6	66.84	14	66.84	4	66.84	5	66.84	5	66.84	8
66.88	12	66.88	6	66.88	15	66.88	5	66.88	5	66.88	2	66.88	8
66.92	6	66.92	5	66.92	11	66.92	11	66.92	8	66.92	1	66.92	5
66.96	9	66.96	5	66.96	6	66.96	5	66.96	4	66.96	5	66.96	5
67	7	67	10	67	10	67	2	67	10	67	1	67	10
67.04	9	67.04	9	67.04	12	67.04	2	67.04	11	67.04	1	67.04	9
67.08	2	67.08	12	67.08	13	67.08	2	67.08	9	67.08	5	67.08	5
67.12	3	67.12	9	67.12	3	67.12	4	67.12	12	67.12	5	67.12	4
67.16	5	67.16	5	67.16	3	67.16	6	67.16	9	67.16	5	67.16	9
67.2	5	67.2	9	67.2	5	67.2	3	67.2	11	67.2	9	67.2	7
67.24	6	67.24	3	67.24	2	67.24	1	67.24	7	67.24	4	67.24	9
67.28	4	67.28	5	67.28	6	67.28	6	67.28	10	67.28	6	67.28	5
67.32	2	67.32	1	67.32	5	67.32	2	67.32	6	67.32	4	67.32	3
67.36	5	67.36	5	67.36	12	67.36	7	67.36	7	67.36	5	67.36	6
67.4	4	67.4	4	67.4	5	67.4	6	67.4	11	67.4	4	67.4	4
67.44	3	67.44	4	67.44	6	67.44	6	67.44	7	67.44	9	67.44	5
67.48	4	67.48	9	67.48	7	67.48	5	67.48	4	67.48	5	67.48	4
67.52	6	67.52	6	67.52	8	67.52	5	67.52	5	67.52	4	67.52	4
67.56	5	67.56	5	67.56	10	67.56	10	67.56	9	67.56	6	67.56	2
67.6	4	67.6	4	67.6	4	67.6	3	67.6	4	67.6	4	67.6	0
67.64	3	67.64	7	67.64	7	67.64	3	67.64	8	67.64	6	67.64	5
67.68	4	67.68	10	67.68	5	67.68	2	67.68	12	67.68	8	67.68	7
67.72	4	67.72	5	67.72	5	67.72	6	67.72	9	67.72	9	67.72	7
67.76	5	67.76	6	67.76	3	67.76	5	67.76	8	67.76	8	67.76	7
67.8	2	67.8	7	67.8	6	67.8	11	67.8	7	67.8	2	67.8	5
67.84	6	67.84	10	67.84	6	67.84	4	67.84	7	67.84	4	67.84	6
67.88	5	67.88	5	67.88	5	67.88	4	67.88	4	67.88	2	67.88	4
67.92	8	67.92	4	67.92	9	67.92	4	67.92	9	67.92	7	67.92	7
67.96	2	67.96	7	67.96	8	67.96	5	67.96	12	67.96	7	67.96	2
68	4	68	5	68	3	68	1	68	8	68	5	68	3
68.04	4	68.04	6	68.04	7	68.04	3	68.04	8	68.04	2	68.04	3
68.08	5	68.08	5	68.08	8	68.08	2	68.08	9	68.08	5	68.08	5
68.12	4	68.12	7	68.12	8	68.12	2	68.12	11	68.12	7	68.12	5
68.16	7	68.16	5	68.16	8	68.16	6	68.16	10	68.16	2	68.16	2
68.2	10	68.2	4	68.2	4	68.2	3	68.2	8	68.2	4	68.2	5
68.24	7	68.24	6	68.24	8	68.24	7	68.24	13	68.24	4	68.24	9
68.28	4	68.28	5	68.28	5	68.28	4	68.28	10	68.28	3	68.28	2
68.32	5	68.32	5	68.32	5	68.32	6	68.32	9	68.32	4	68.32	3
68.36	3	68.36	5	68.36	7	68.36	2	68.36	9	68.36	3	68.36	6
68.4	8	68.4	5	68.4	5	68.4	5	68.4	6	68.4	2	68.4	3
68.44	6	68.44	5	68.44	5	68.44	4	68.44	6	68.44	5	68.44	4
68.48	5	68.48	7	68.48	6	68.48	2	68.48	11	68.48	5	68.48	8
68.52	1	68.52	3	68.52	5	68.52	6	68.52	11	68.52	5	68.52	0
68.56	5	68.56	7	68.56	7	68.56	4	68.56	6	68.56	3	68.56	6
68.6	2	68.6	3	68.6	6	68.6	3	68.6	8	68.6	6	68.6	4
68.64	5	68.64	10	68.64	6	68.64	2	68.64	5	68.64	5	68.64	6
68.68	1	68.68	6	68.68	6	68.68	1	68.68	6	68.68	7	68.68	1
68.72	8	68.72	4	68.72	2	68.72	3	68.72	2	68.72	3	68.72	5
68.76	4	68.76	2	68.76	9	68.76	6	68.76	6	68.76	5	68.76	3
68.8	3	68.8	5	68.8	7	68.8	6	68.8	5	68.8	3	68.8	9
68.84	1	68.84	3	68.84	7	68.84	2	68.84	7	68.84	7	68.84	7
68.88	3	68.88	3	68.88	4	68.88	6	68.88	8	68.88	4	68.88	9
68.92	4	68.92	9	68.92	5	68.92	6	68.92	7	68.92	8	68.92	4
68.96	3	68.96	4	68.96	3	68.96	8	68.96	10	68.96	5	68.96	4
69	6	69	2	69	10	69	1	69	9	69	5	69	7
69.04	3	69.04	6	69.04	10	69.04	6	69.04	8	69.04	6	69.04	6
69.08	4	69.08	5	69.08	8	69.08	2	69.08	9	69.08	4	69.08	0
69.12	7	69.12	9	69.12	1	69.12	3	69.12	7	69.12	8	69.12	3
69.16	9	69.16	7	69.16	8	69.16	3	69.16	5	69.16	5	69.16	3
69.2	13	69.2	6	69.2	8	69.2	5	69.2	4	69.2	7	69.2	3
69.24	3	69.24	8	69.24	6	69.24	3	69.24	8	69.24	3	69.24	3
69.28	6	69.28	9	69.28	7	69.28	3	69.28	4	69.28	2	69.28	9
69.32	5	69.32	5	69.32	7	69.32	6	69.32	6	69.32	4	69.32	7
69.36	5	69.36	7	69.36	7	69.36	2	69.36	7	69.36	3	69.36	7
69.4	6	69.4	2	69.4	5	69.4	4	69.4	5	69.4	4	69.4	2
69.44	5	69.44	9	69.44	9	69.44	7	69.44	14	69.44	1	69.44	5
69.48	6	69.48	7	69.48	8	69.48	5	69.48	6	69.48	4	69.48	8
69.52	3	69.52	5	69.52	1	69.52	2	69.52	13	69.52	4	69.52	5
69.56	6	69.56	8	69.56	3	69.56	6	69.56	9	69.56	4	69.56	6
69.6	4	69.6	7	69.6	5	69.6	5	69.6	7	69.6	5	69.6	5
69.64	8	69.64	3	69.64	6	69.64	4	69.64	8	69.64	7	69.64	3
69.68	4	69.68	6	69.68	7	69.68	2	69.68	7	69.68	6	69.68	5
69.72	3	69.72	5	69.72	7	69.72	4	69.72	7	69.72	5	69.72	5
69.76	6	69.76	4	69.76	6	69.76	2	69.76	9	69.76	9	69.76	4
69.8	4	69.8	4	69.8	1	69.8	2	69.8	3	69.8	3	69.8	2
69.84	3	69.84	3	69.84	9	69.84	3	69.84	5	69.84	4	69.84	6
69.88	8	69.88	5	69.88	4	69.88	5	69.88	6	69.88	2	69.88	2
69.92	5	69.92	6	69.92	2	69.92	9	69.92	5	69.92	6	69.92	3
69.96	3	69.96	5	69.96	5	69.96	6	69.96	6	69.96	6	69.96	7
70	2	70	9	70	8	70	4	70	4	70	7	70	3
